# Supplementary material for: Detecting Rhythms in Time Series with RAIN
Source: PubMed Central journal article supplement — J Biol Rhythms. 2014 Dec;29(6):391–400. doi: 10.1177/0748730414553029 (PMC4266694; doi:10.1177/0748730414553029), 2014-12
Supplement: Figure_S4.pdf [file Figure_S4.pdf]

**S-Interval: 2; S to N: 1; Outliers: FALSE**

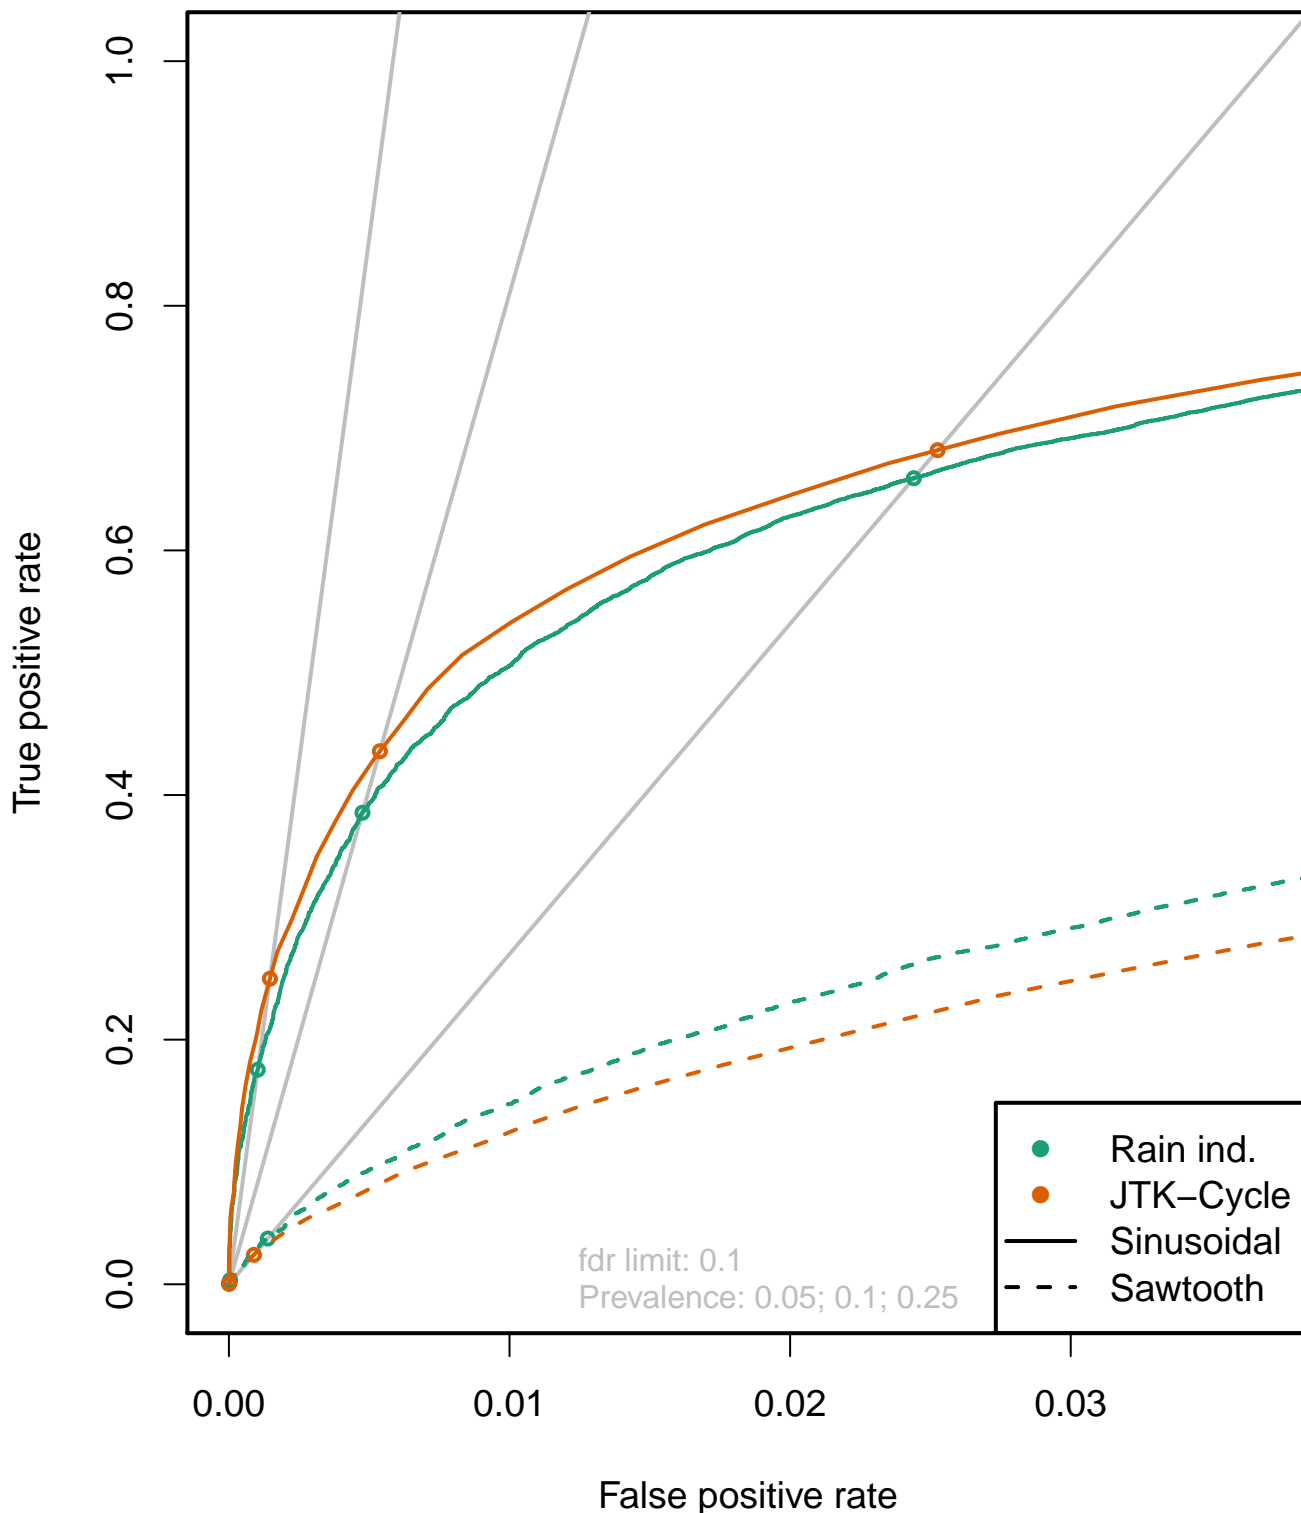

| Rain ind. |      |      |
|-----------|------|------|
|           | sin  | saw  |
| 0.05      | 0.18 | 0.00 |
| 0.1       | 0.39 | 0.00 |
| 0.25      | 0.66 | 0.04 |

| JTK-Cycle |      |      |
|-----------|------|------|
|           | sin  | saw  |
| 0.05      | 0.25 | 0.00 |
| 0.1       | 0.44 | 0.00 |
| 0.25      | 0.68 | 0.02 |

**S-Interval: 2; S to N: 2; Outliers: FALSE**

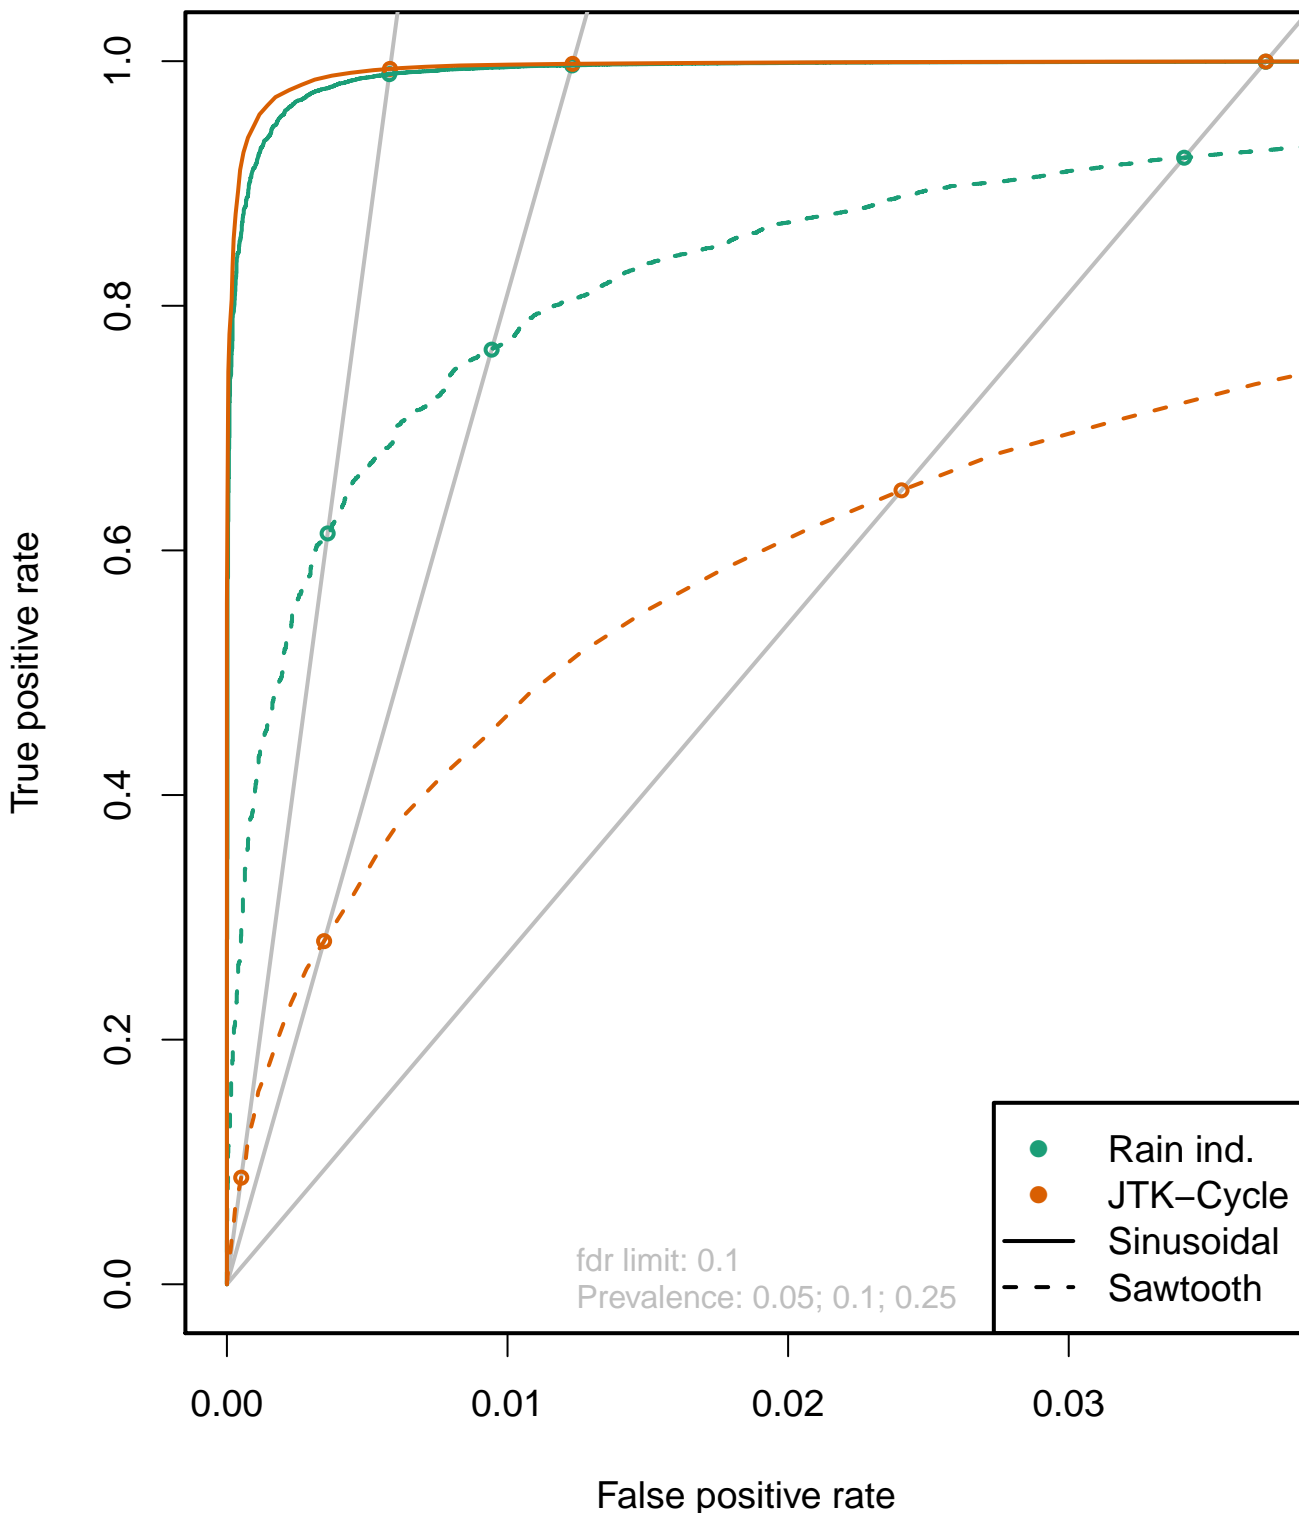

| Rain ind. |      |      |
|-----------|------|------|
|           | sin  | saw  |
| 0.05      | 0.99 | 0.61 |
| 0.1       | 1.00 | 0.76 |
| 0.25      | 1.00 | 0.92 |

| JTK-Cycle |      |      |
|-----------|------|------|
|           | sin  | saw  |
| 0.05      | 0.99 | 0.09 |
| 0.1       | 1.00 | 0.28 |
| 0.25      | 1.00 | 0.65 |

**S-Interval: 2; S to N: 3; Outliers: FALSE**

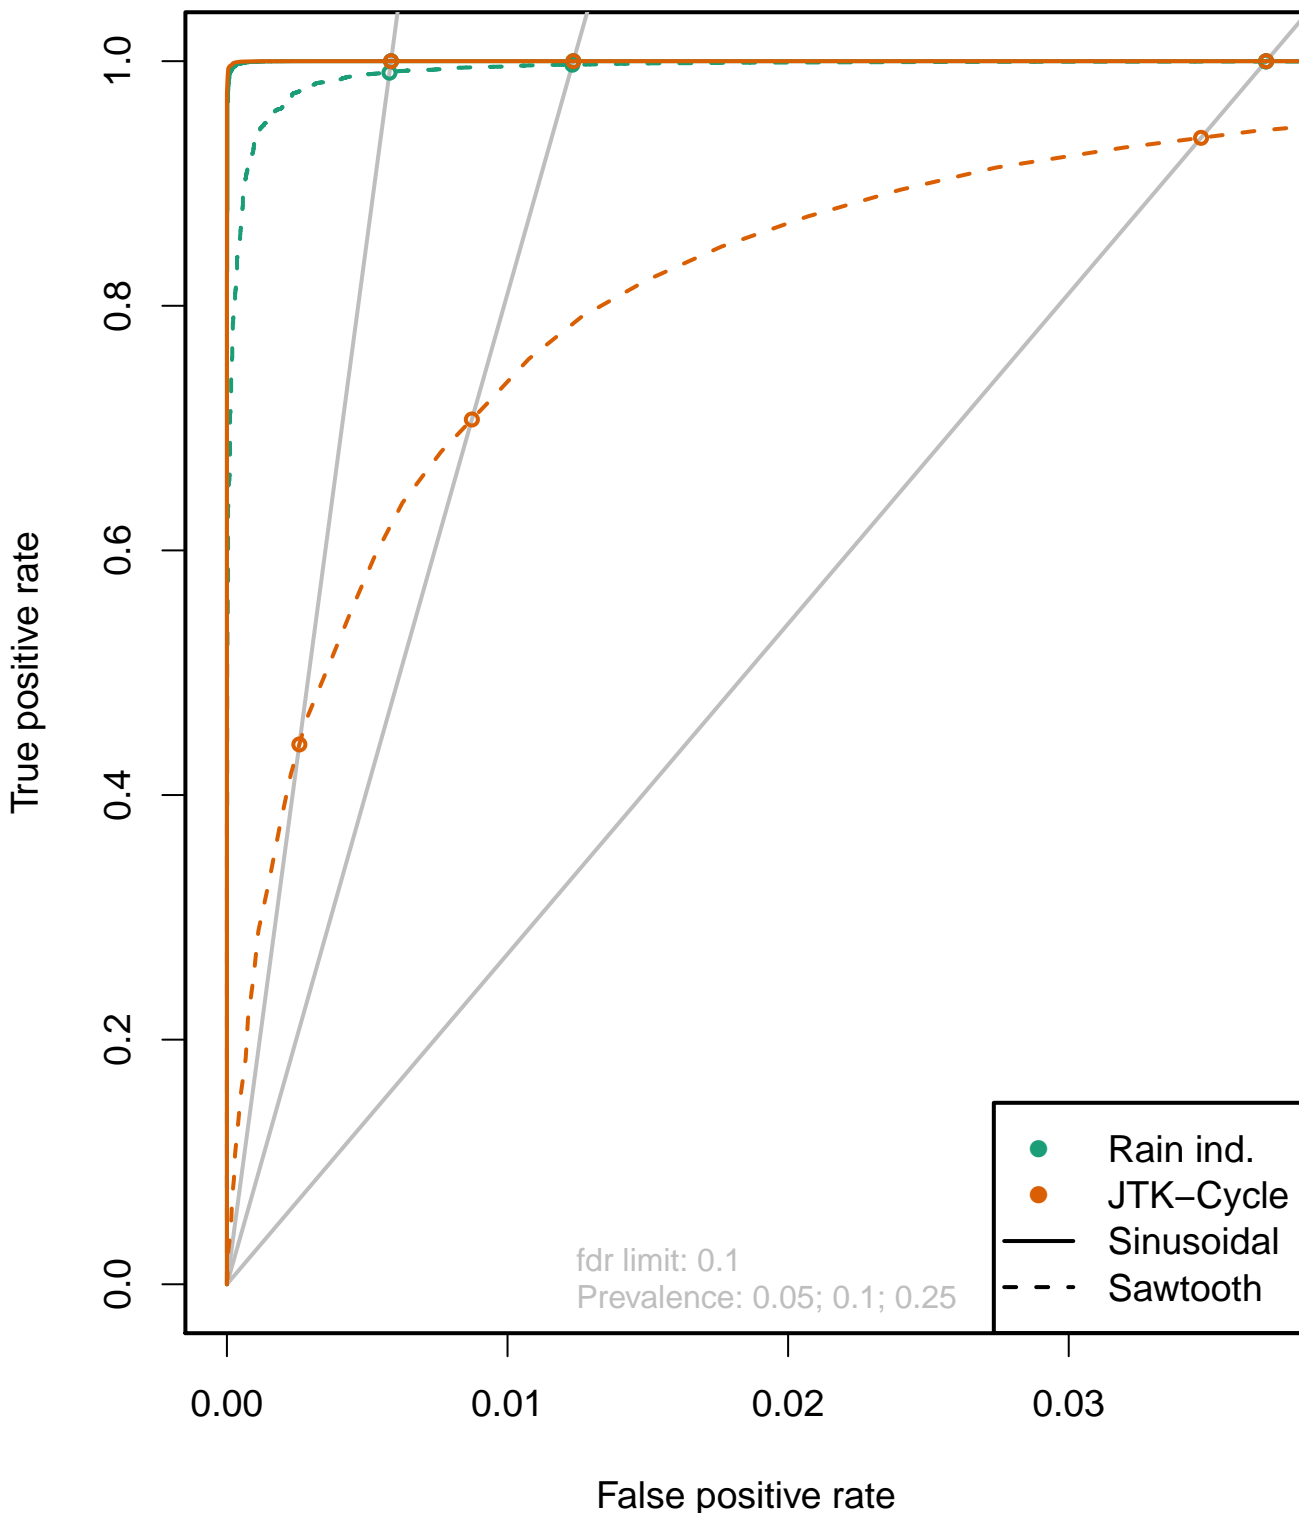

| Rain ind. |      |      |
|-----------|------|------|
|           | sin  | saw  |
| 0.05      | 1.00 | 0.99 |
| 0.1       | 1.00 | 1.00 |
| 0.25      | 1.00 | 1.00 |

| JTK-Cycle |      |      |
|-----------|------|------|
|           | sin  | saw  |
| 0.05      | 1.00 | 0.44 |
| 0.1       | 1.00 | 0.71 |
| 0.25      | 1.00 | 0.94 |

**S-Interval: 2; S to N: native; Outliers: FALSE**

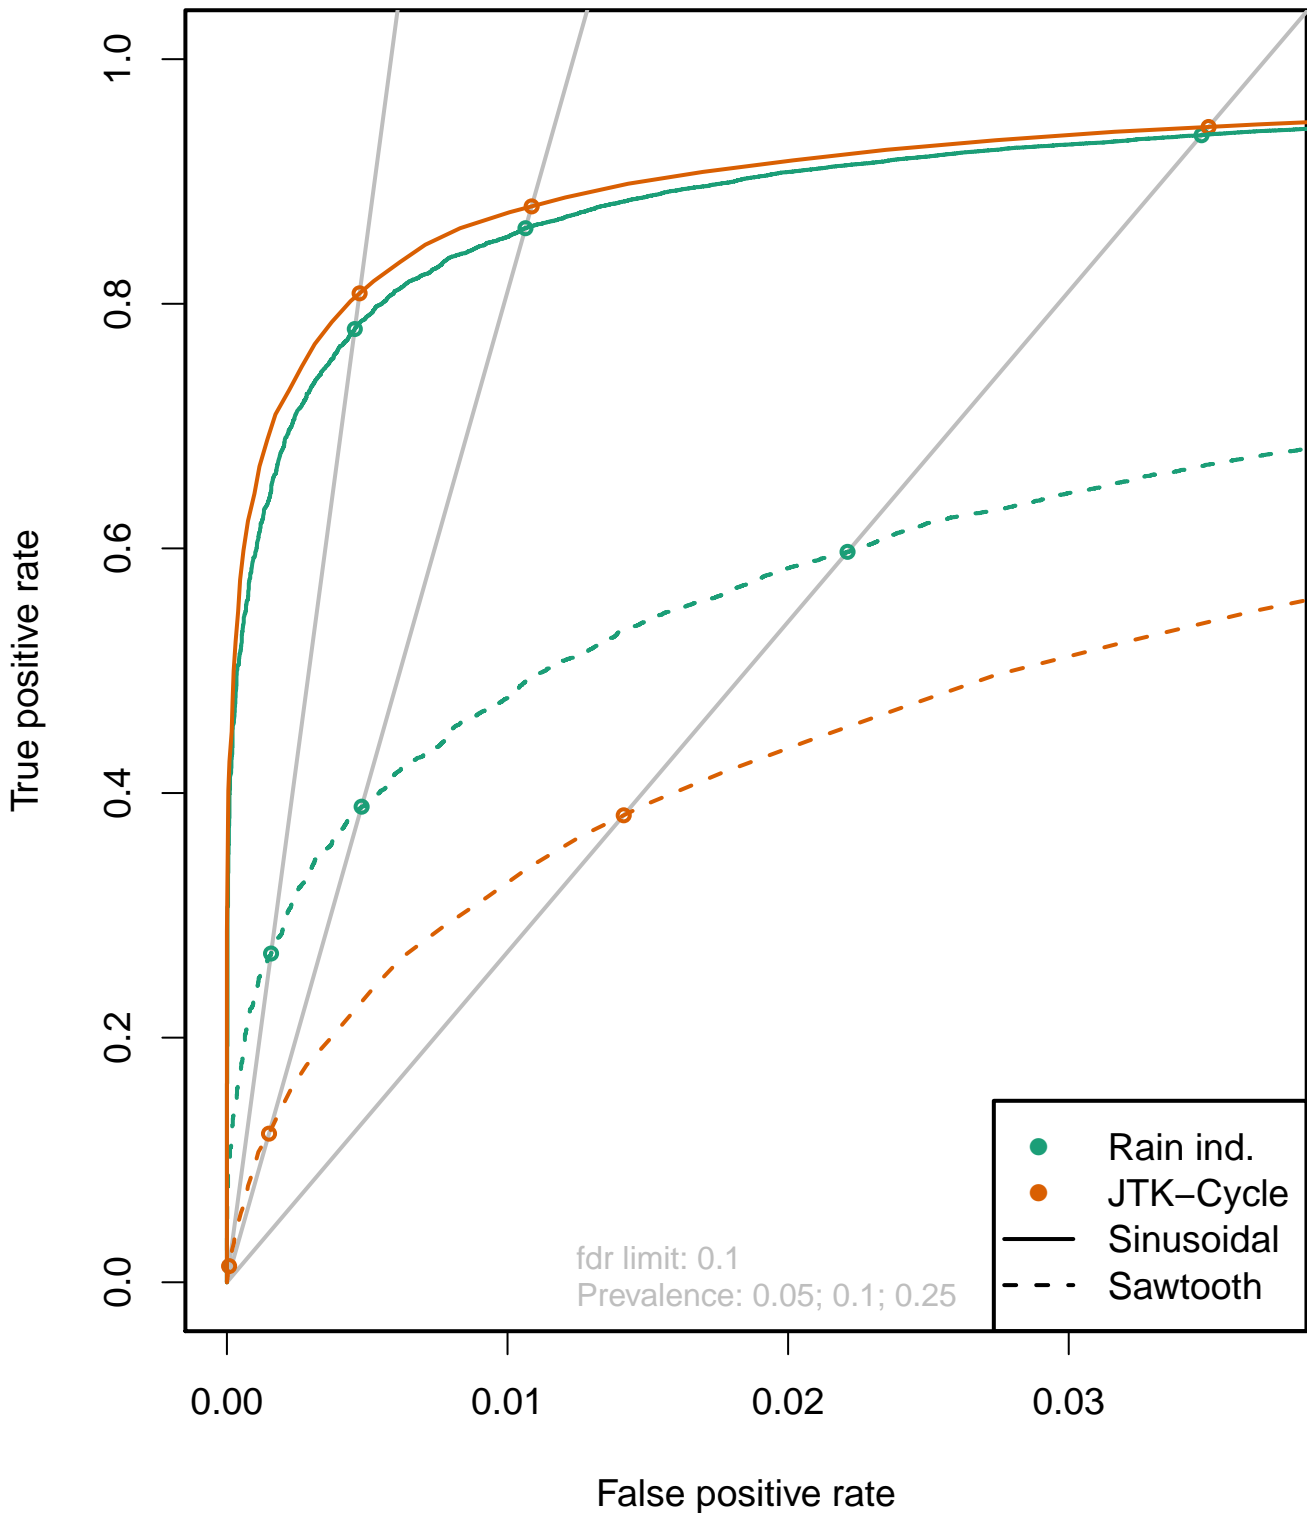

| Rain ind. |      |      |
|-----------|------|------|
|           | sin  | saw  |
| 0.05      | 0.78 | 0.27 |
| 0.1       | 0.86 | 0.39 |
| 0.25      | 0.94 | 0.60 |

| JTK-Cycle |      |      |
|-----------|------|------|
|           | sin  | saw  |
| 0.05      | 0.81 | 0.01 |
| 0.1       | 0.88 | 0.12 |
| 0.25      | 0.94 | 0.38 |

# S-Interval: 3; S to N: 1; Outliers: FALSE

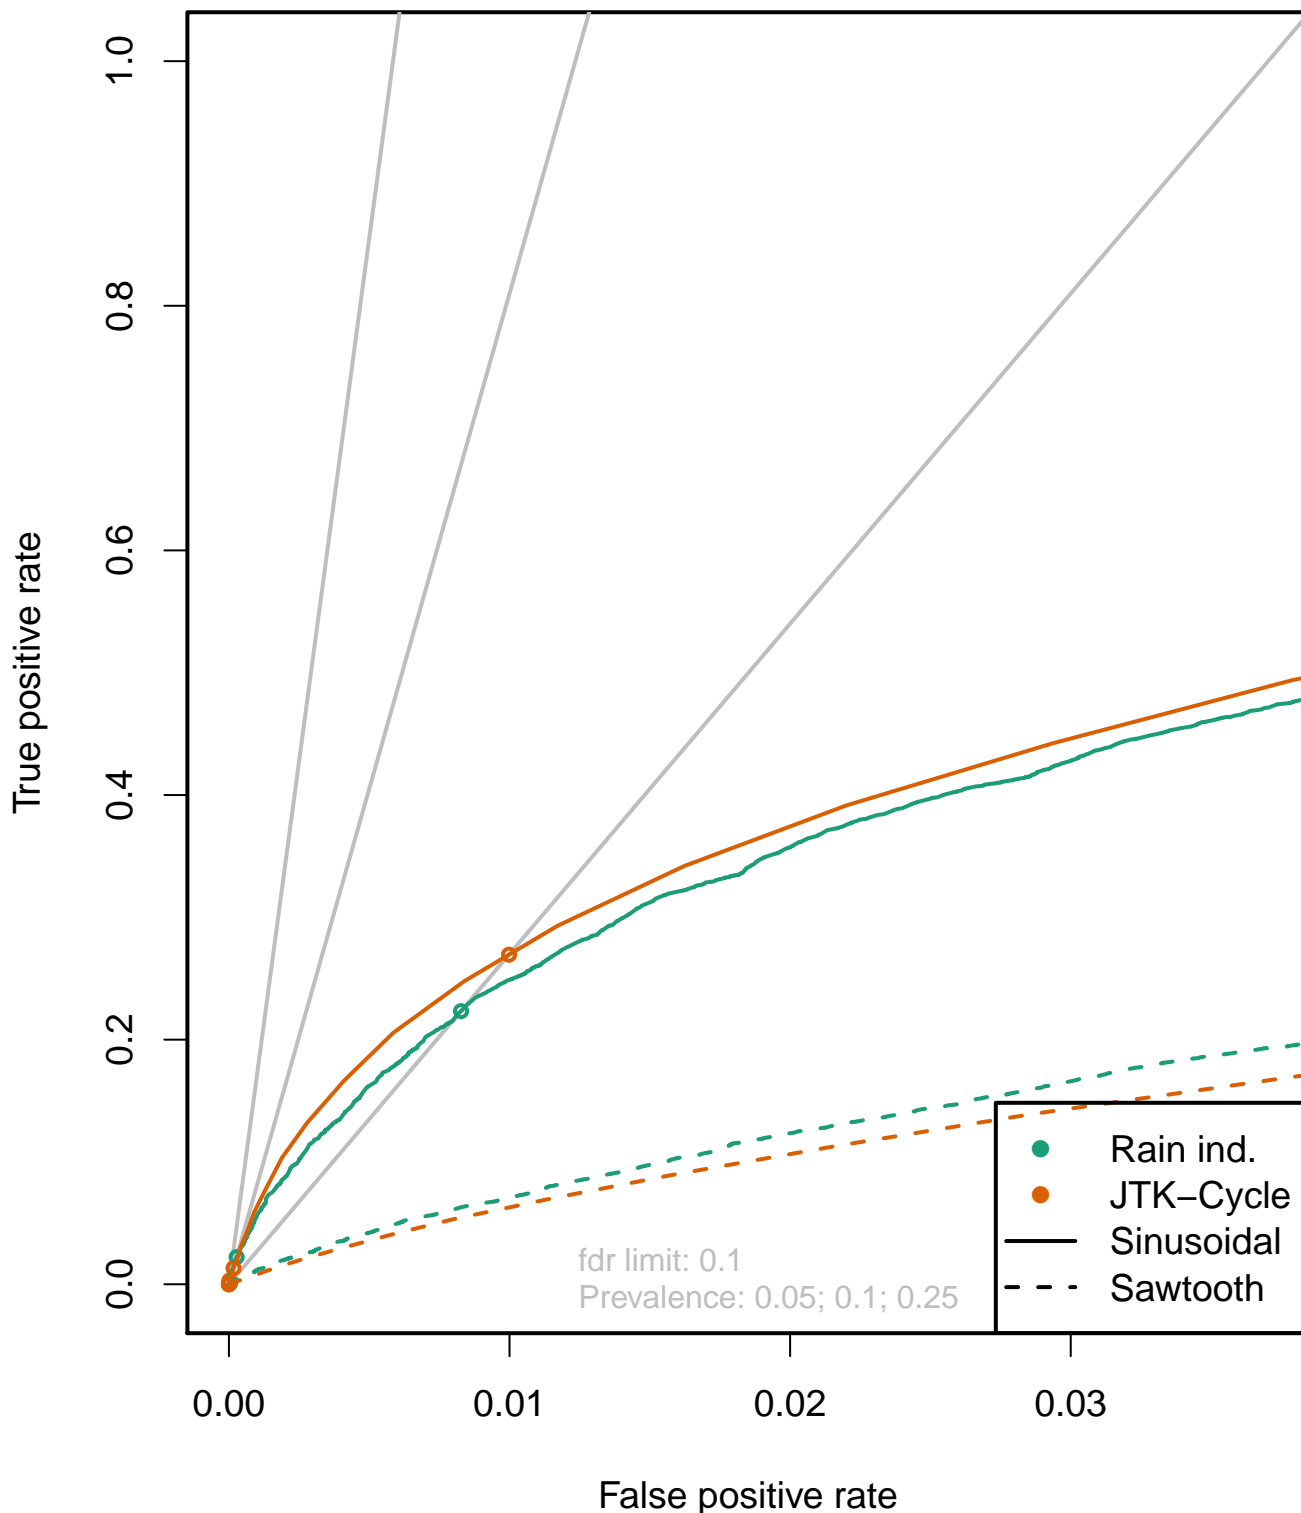

| Rain ind. |      |      |
|-----------|------|------|
|           | sin  | saw  |
| 0.05      | 0.00 | 0.00 |
| 0.1       | 0.02 | 0.00 |
| 0.25      | 0.22 | 0.00 |

| JTK-Cycle |      |      |
|-----------|------|------|
|           | sin  | saw  |
| 0.05      | 0.00 | 0.00 |
| 0.1       | 0.01 | 0.00 |
| 0.25      | 0.27 | 0.00 |

# S-Interval: 3; S to N: 2; Outliers: FALSE

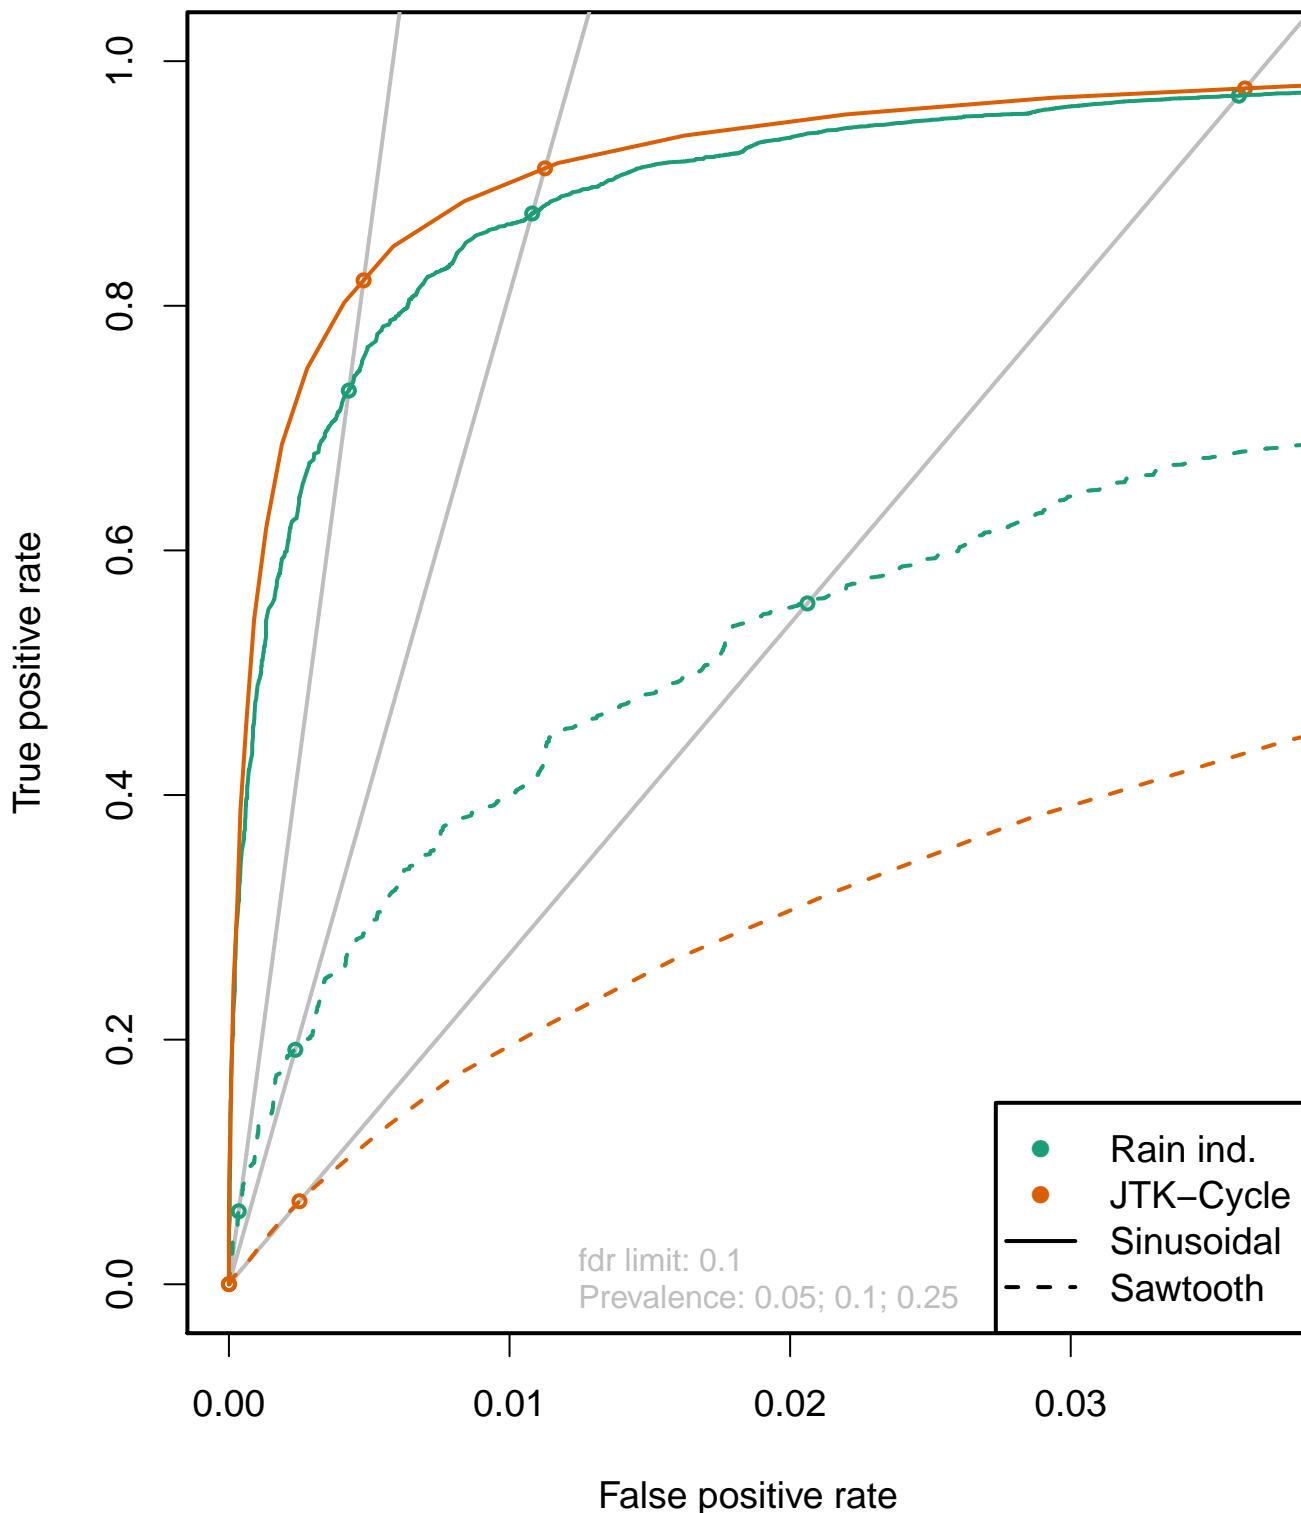

| Rain ind. |      |      |
|-----------|------|------|
|           | sin  | saw  |
| 0.05      | 0.73 | 0.06 |
| 0.1       | 0.88 | 0.19 |
| 0.25      | 0.97 | 0.56 |

| JTK-Cycle |      |      |
|-----------|------|------|
|           | sin  | saw  |
| 0.05      | 0.82 | 0.00 |
| 0.1       | 0.91 | 0.00 |
| 0.25      | 0.98 | 0.07 |

**S-Interval: 3; S to N: 3; Outliers: FALSE**

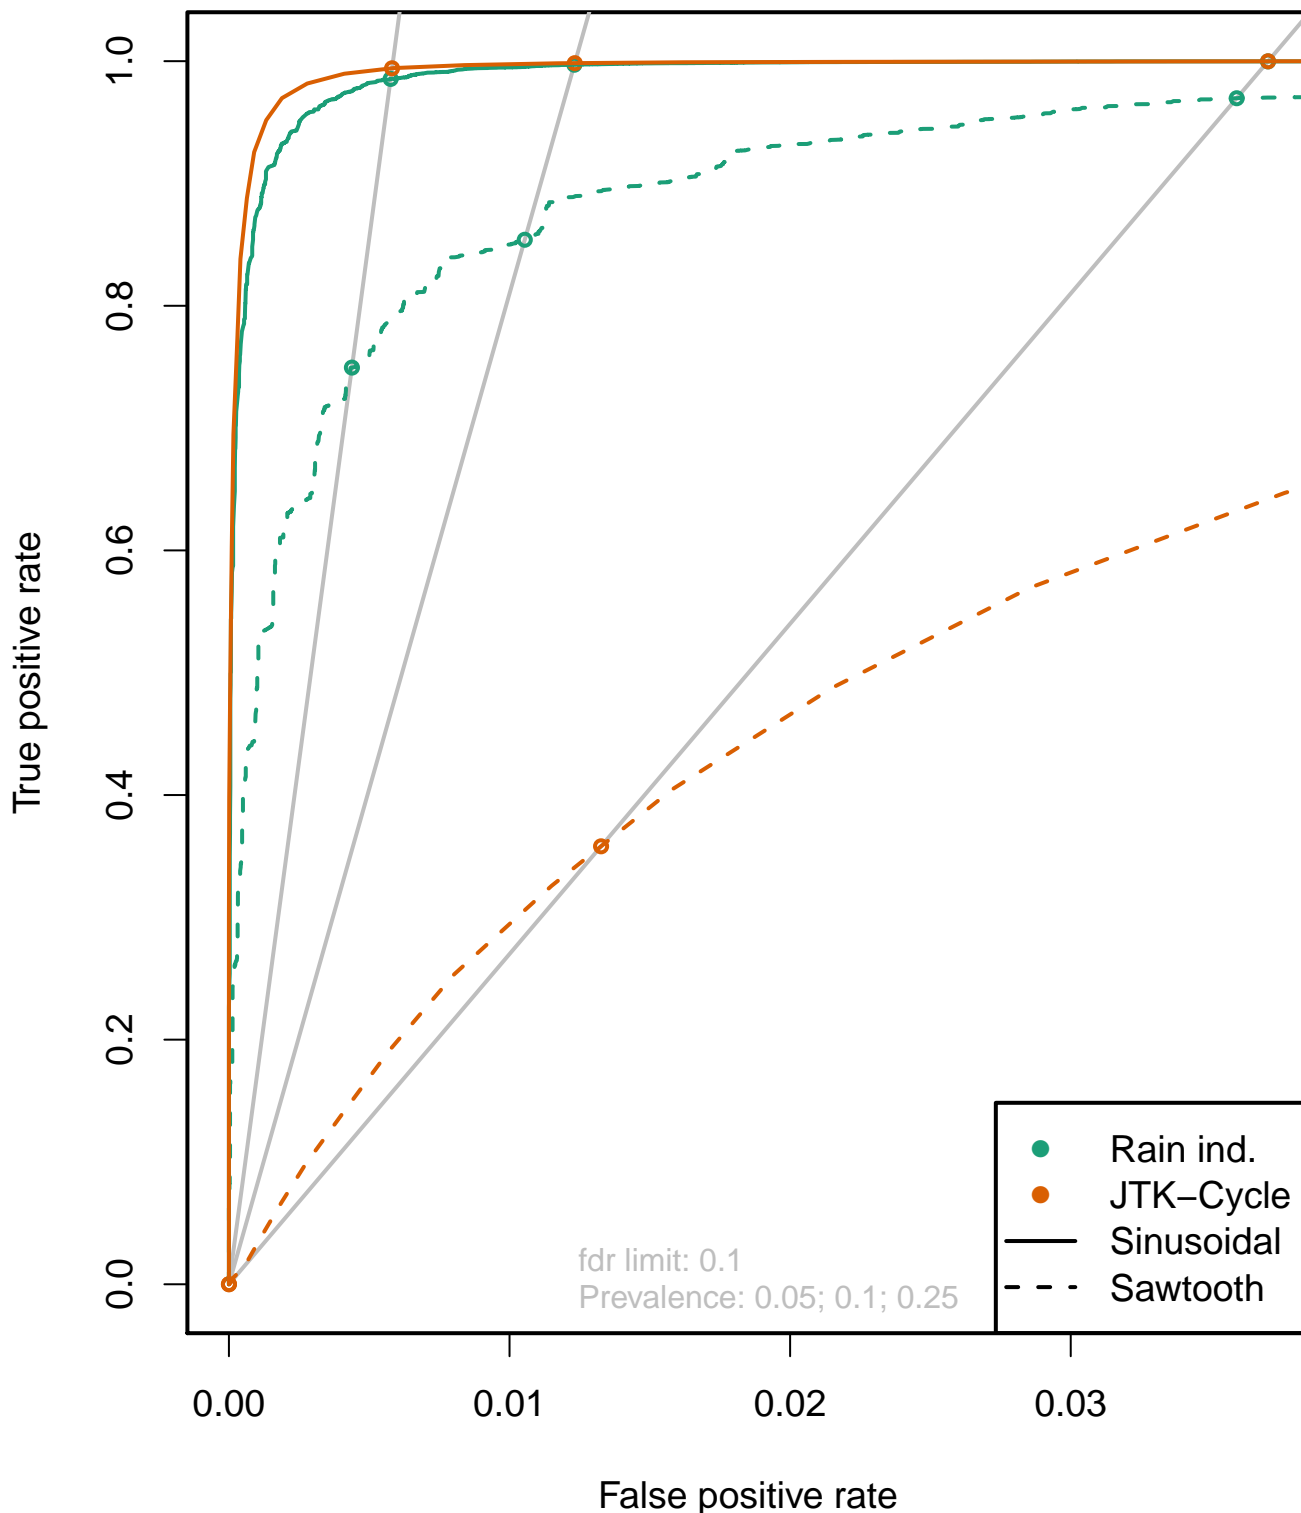

| Rain ind. |      |      |
|-----------|------|------|
|           | sin  | saw  |
| 0.05      | 0.99 | 0.75 |
| 0.1       | 1.00 | 0.85 |
| 0.25      | 1.00 | 0.97 |

| JTK-Cycle |      |      |
|-----------|------|------|
|           | sin  | saw  |
| 0.05      | 0.99 | 0.00 |
| 0.1       | 1.00 | 0.00 |
| 0.25      | 1.00 | 0.36 |

**S-Interval: 3; S to N: native; Outliers: FALSE**

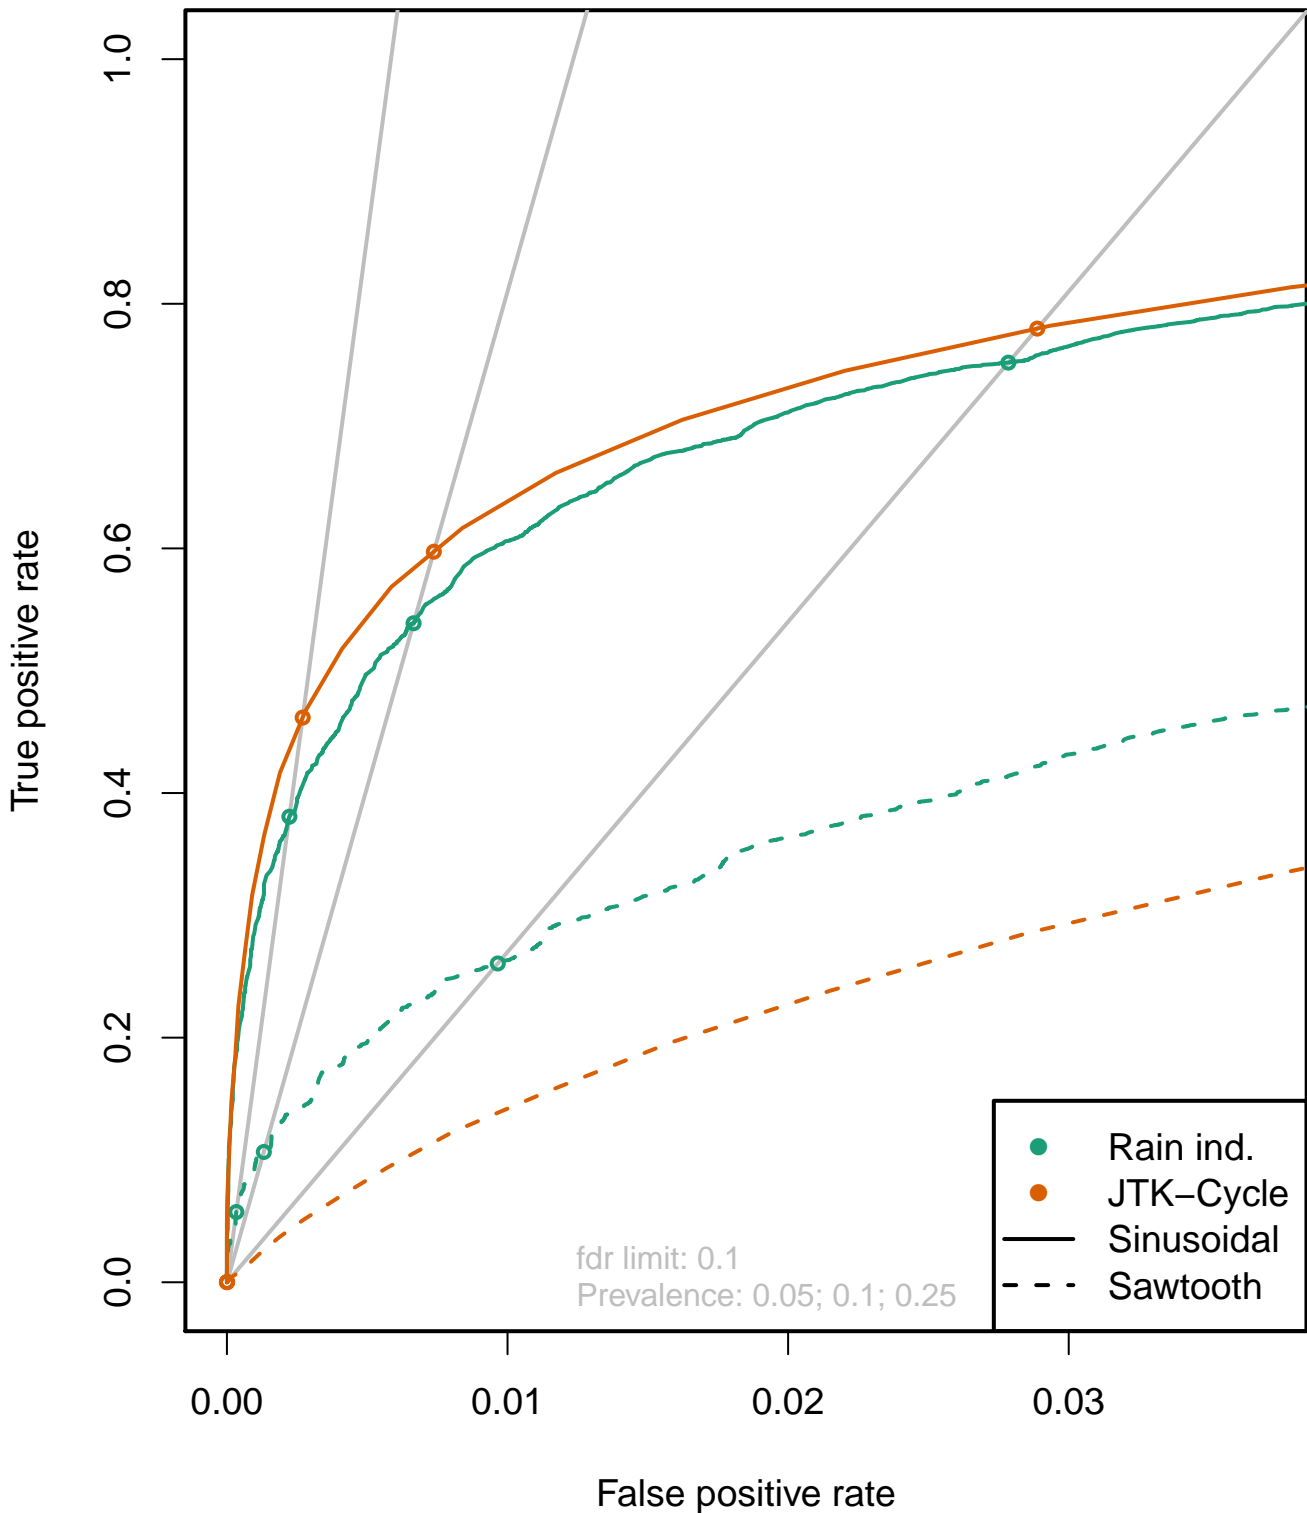

| Rain ind. |      |      |
|-----------|------|------|
|           | sin  | saw  |
| 0.05      | 0.38 | 0.06 |
| 0.1       | 0.54 | 0.11 |
| 0.25      | 0.75 | 0.26 |

| JTK-Cycle |      |      |
|-----------|------|------|
|           | sin  | saw  |
| 0.05      | 0.46 | 0.00 |
| 0.1       | 0.60 | 0.00 |
| 0.25      | 0.78 | 0.00 |



**S-Interval: 4; S to N: 1; Outliers: FALSE**

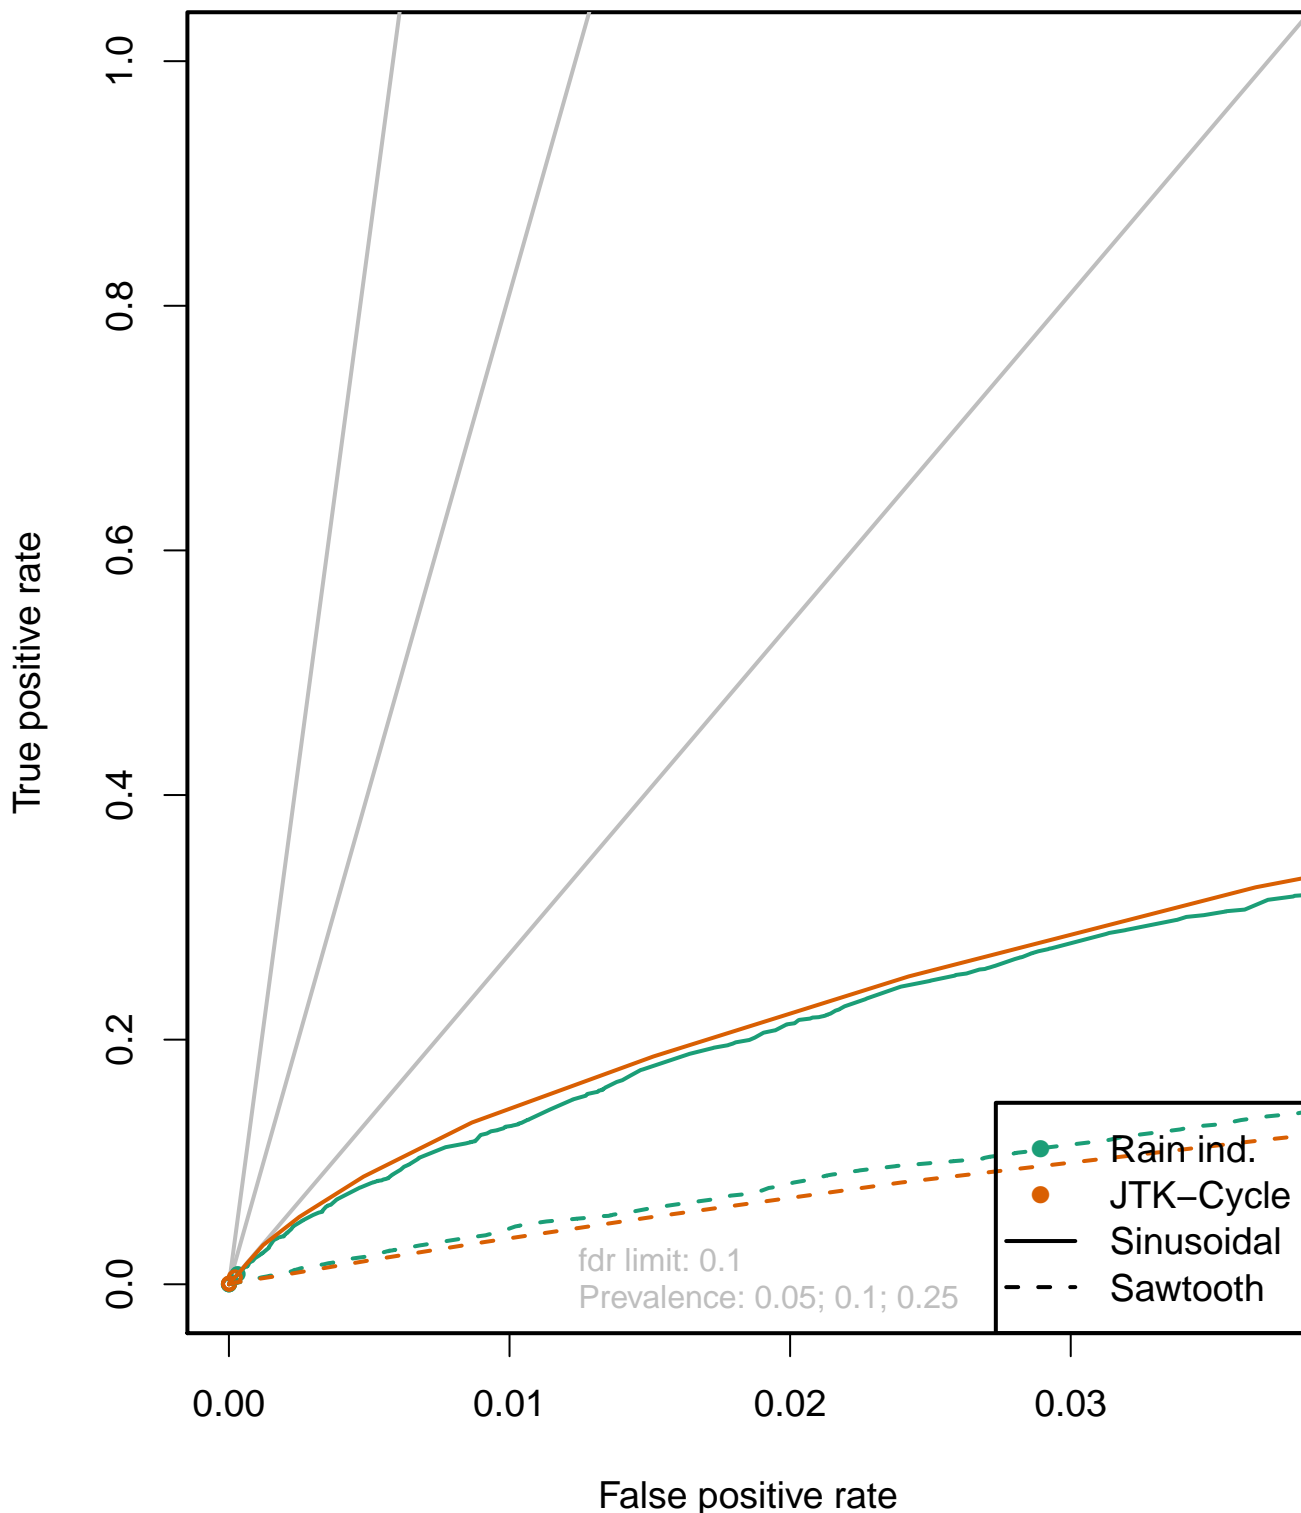

| Rain ind. |      |      |
|-----------|------|------|
|           | sin  | saw  |
| 0.05      | NA   | 0.00 |
| 0.1       | NA   | 0.00 |
| 0.25      | 0.01 | 0.00 |

| JTK-Cycle |      |     |
|-----------|------|-----|
|           | sin  | saw |
| 0.05      | 0.00 | NA  |
| 0.1       | 0.00 | NA  |
| 0.25      | 0.01 | NA  |

**S-Interval: 4; S to N: 2; Outliers: FALSE**

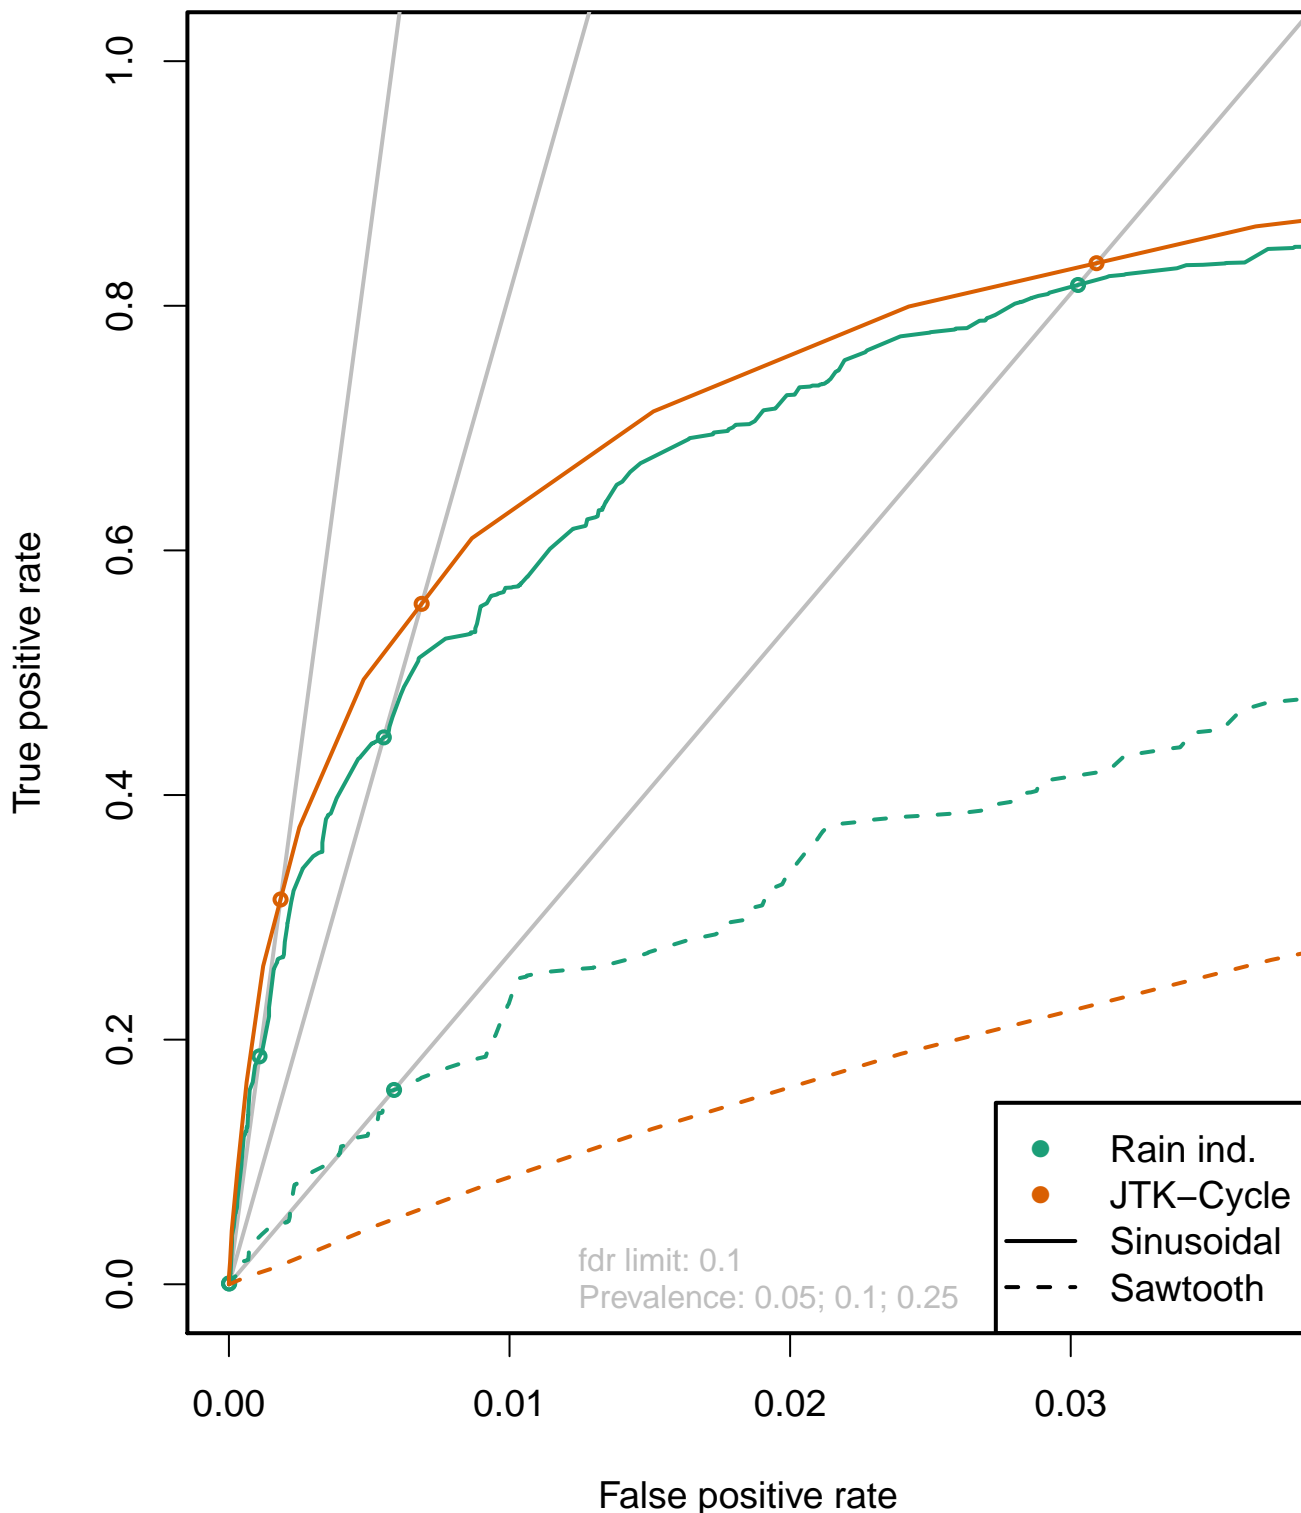

| Rain ind. |      |      |
|-----------|------|------|
|           | sin  | saw  |
| 0.05      | 0.19 | 0.00 |
| 0.1       | 0.45 | 0.00 |
| 0.25      | 0.82 | 0.16 |

| JTK-Cycle |      |     |
|-----------|------|-----|
|           | sin  | saw |
| 0.05      | 0.31 | NA  |
| 0.1       | 0.56 | NA  |
| 0.25      | 0.83 | NA  |

**S-Interval: 4; S to N: 3; Outliers: FALSE**

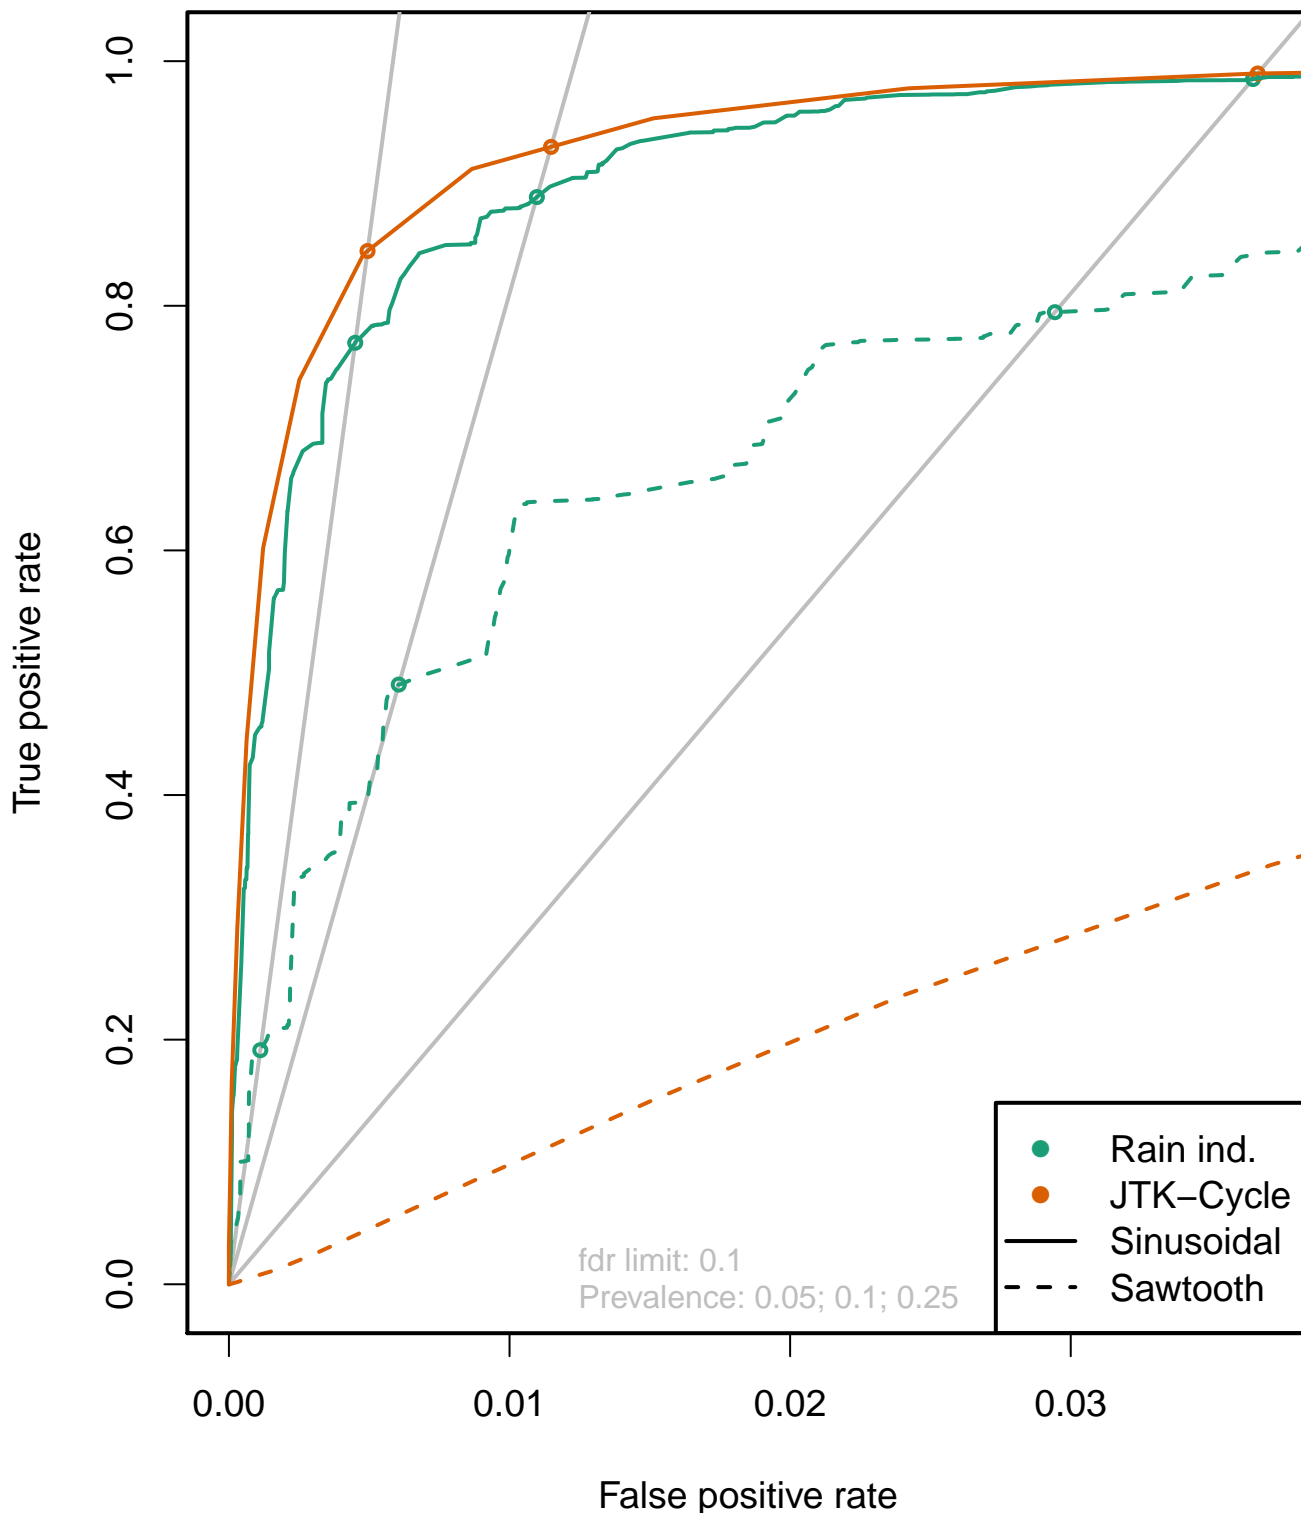

| Rain ind. |      |      |
|-----------|------|------|
|           | sin  | saw  |
| 0.05      | 0.77 | 0.19 |
| 0.1       | 0.89 | 0.49 |
| 0.25      | 0.99 | 0.79 |

| JTK-Cycle |      |     |
|-----------|------|-----|
|           | sin  | saw |
| 0.05      | 0.84 | NA  |
| 0.1       | 0.93 | NA  |
| 0.25      | 0.99 | NA  |

**S-Interval: 4; S to N: native; Outliers: FALSE**

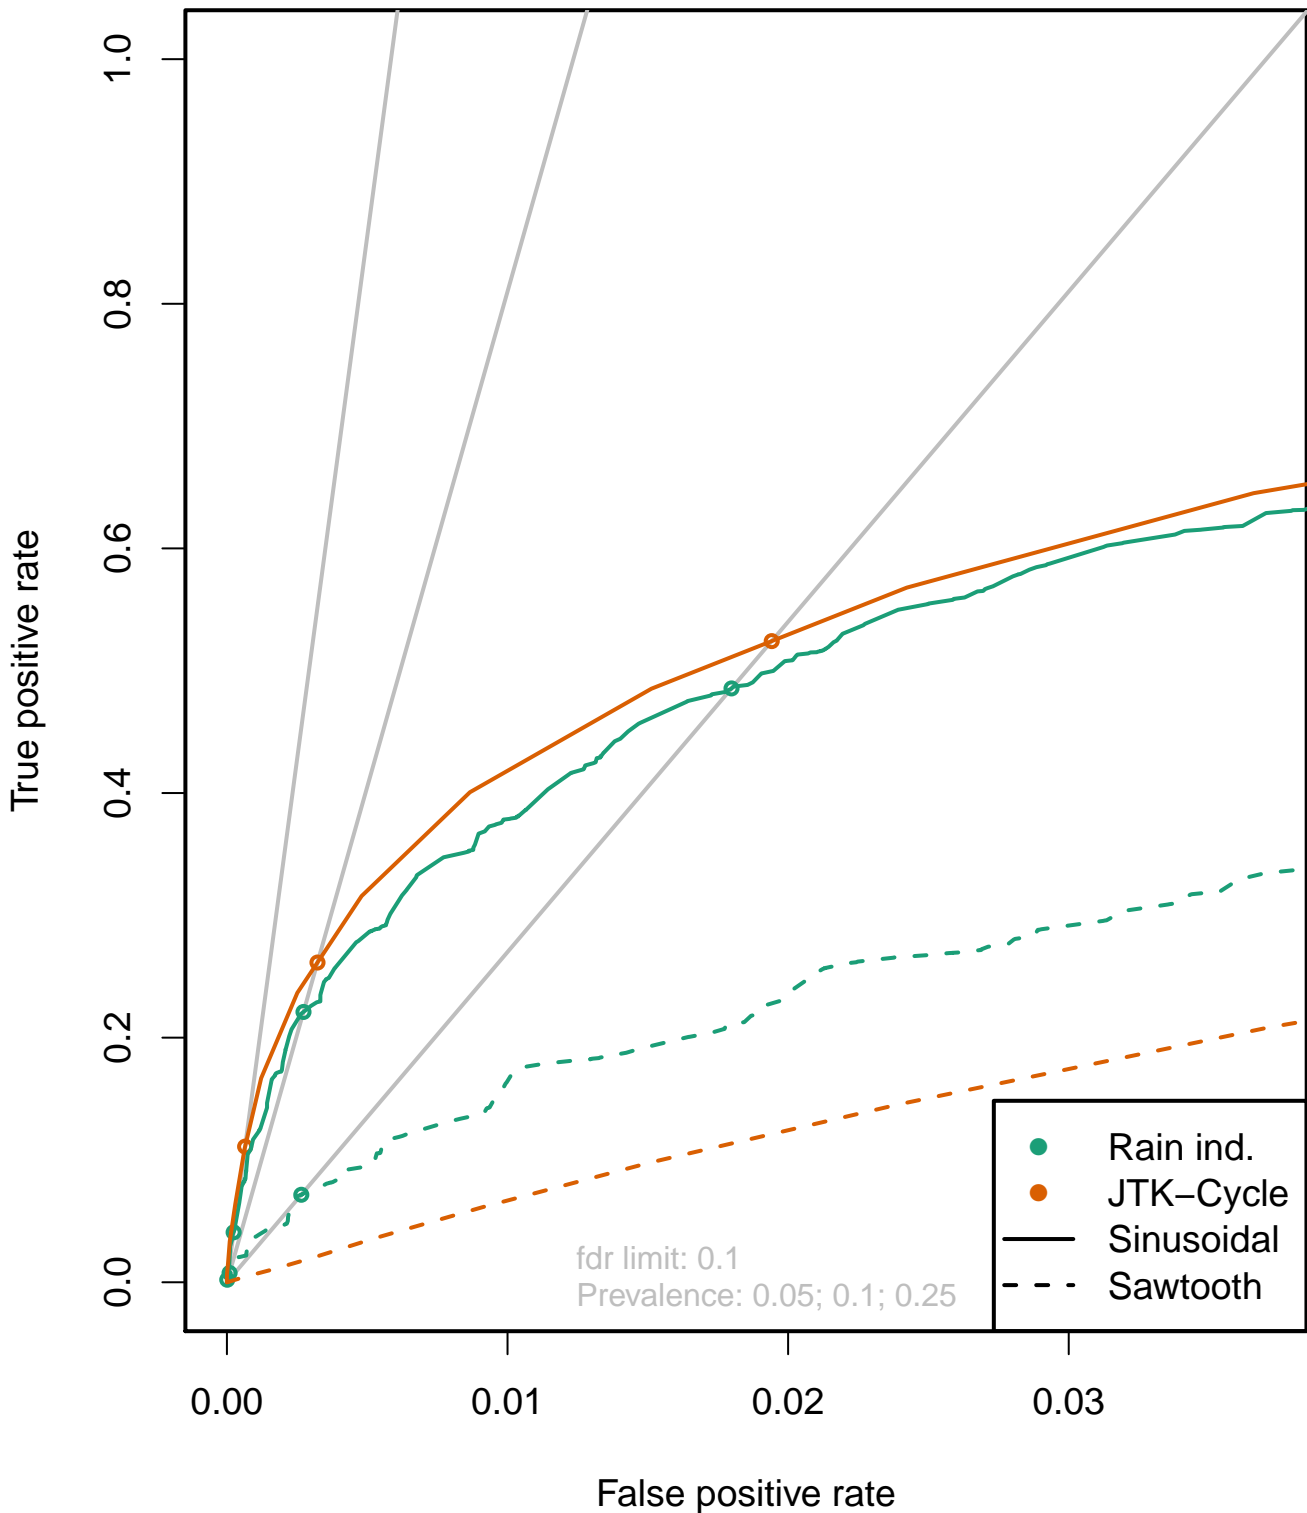

| Rain ind. |      |      |
|-----------|------|------|
| sin       | saw  |      |
| 0.05      | 0.04 | 0.00 |
| 0.1       | 0.22 | 0.01 |
| 0.25      | 0.49 | 0.07 |

| JTK-Cycle |      |    |
|-----------|------|----|
| sin       | saw  |    |
| 0.05      | 0.11 | NA |
| 0.1       | 0.26 | NA |
| 0.25      | 0.52 | NA |

**S-Interval: 2; S to N: 1; Outliers: TRUE**

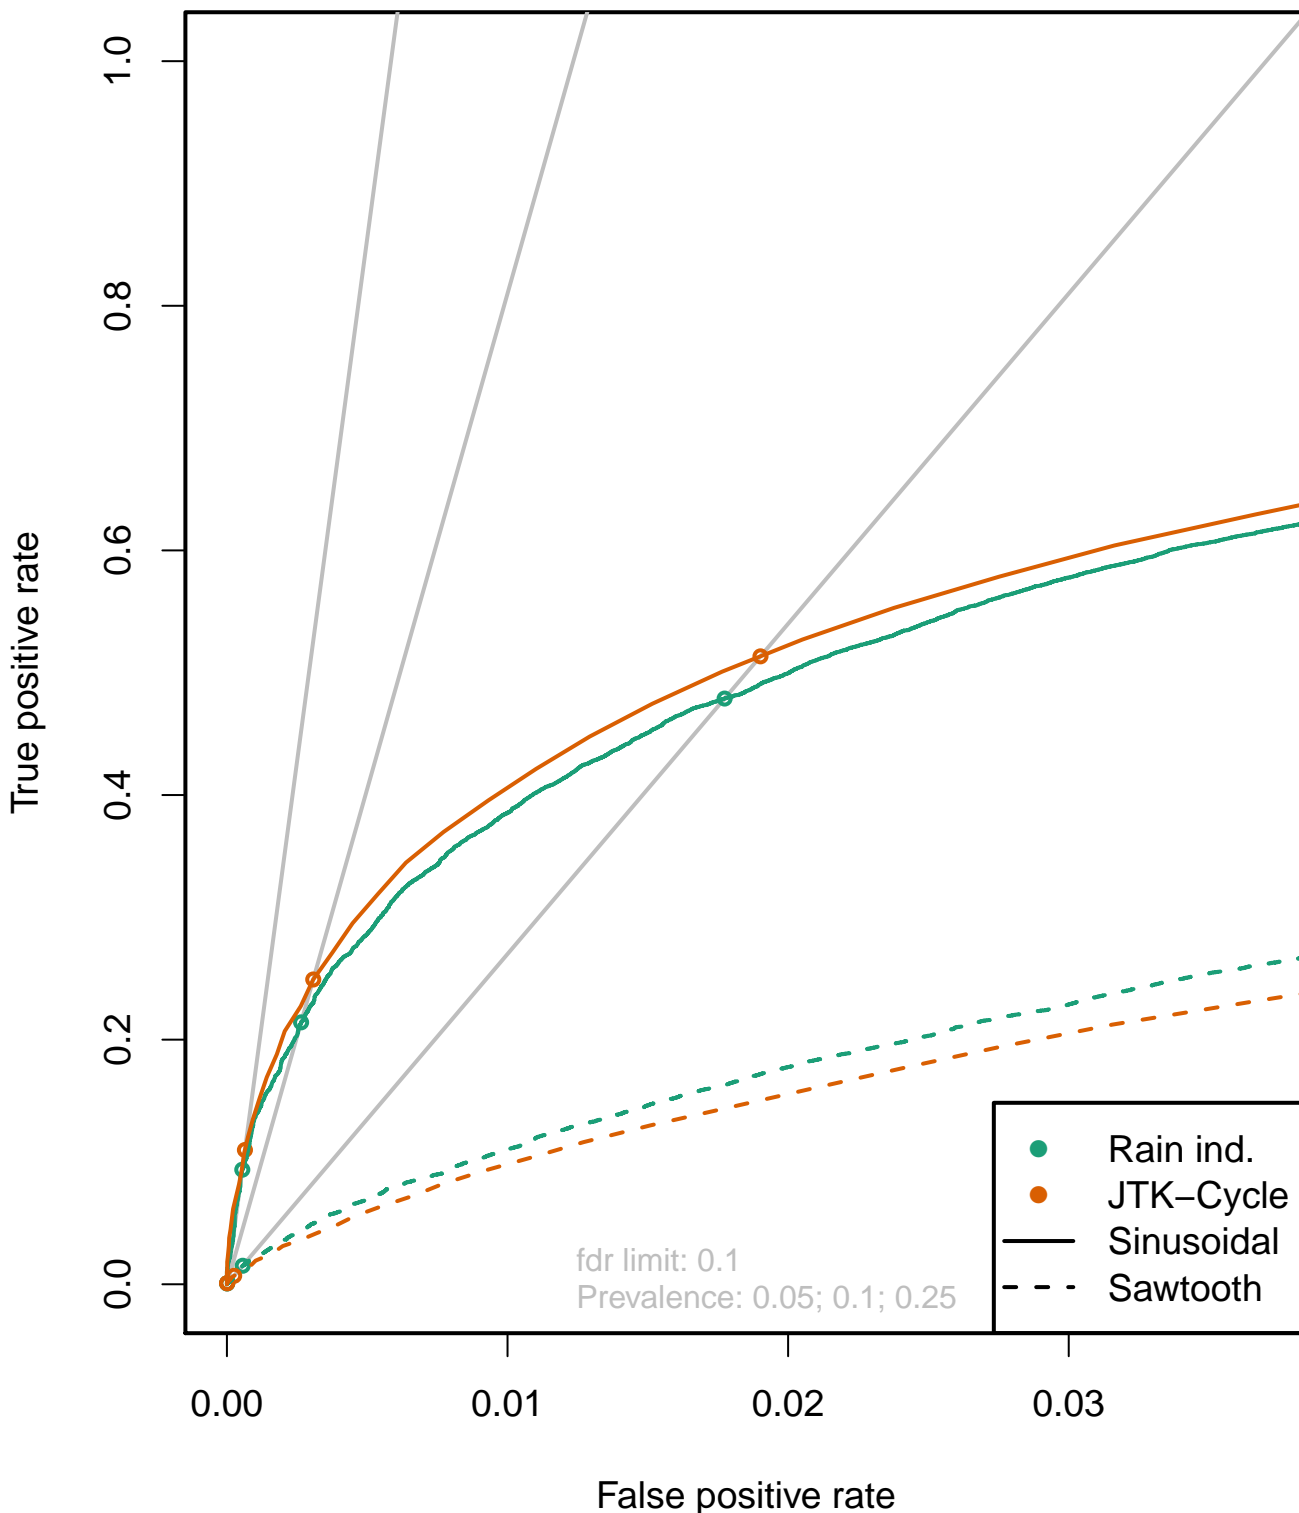

| Rain ind. |      |      |
|-----------|------|------|
| sin       | saw  |      |
| 0.05      | 0.09 | 0.00 |
| 0.1       | 0.21 | 0.00 |
| 0.25      | 0.48 | 0.02 |

| JTK-Cycle |      |      |
|-----------|------|------|
| sin       | saw  |      |
| 0.05      | 0.11 | 0.00 |
| 0.1       | 0.25 | 0.00 |
| 0.25      | 0.51 | 0.01 |

**S-Interval: 2; S to N: 2; Outliers: TRUE**

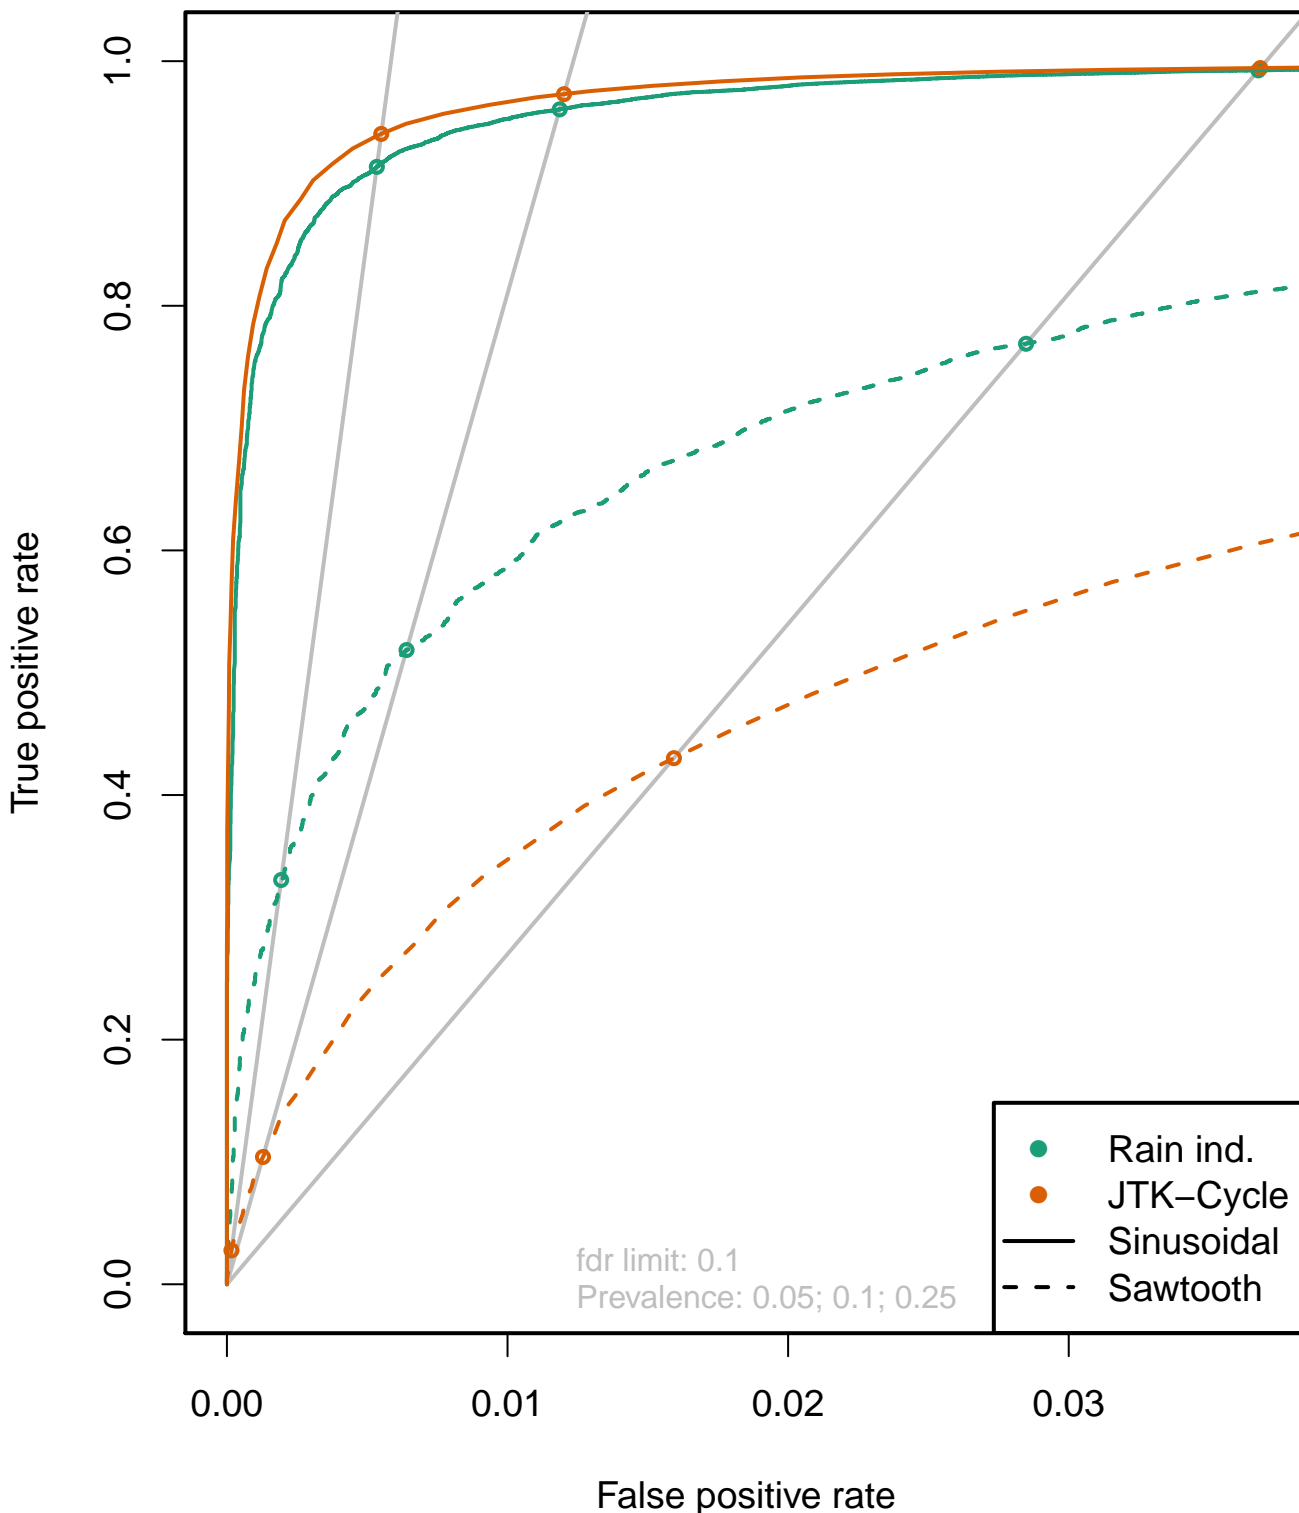

| Rain ind. |      |      |
|-----------|------|------|
|           | sin  | saw  |
| 0.05      | 0.91 | 0.33 |
| 0.1       | 0.96 | 0.52 |
| 0.25      | 0.99 | 0.77 |

| JTK-Cycle |      |      |
|-----------|------|------|
|           | sin  | saw  |
| 0.05      | 0.94 | 0.03 |
| 0.1       | 0.97 | 0.10 |
| 0.25      | 0.99 | 0.43 |

**S-Interval: 2; S to N: 3; Outliers: TRUE**

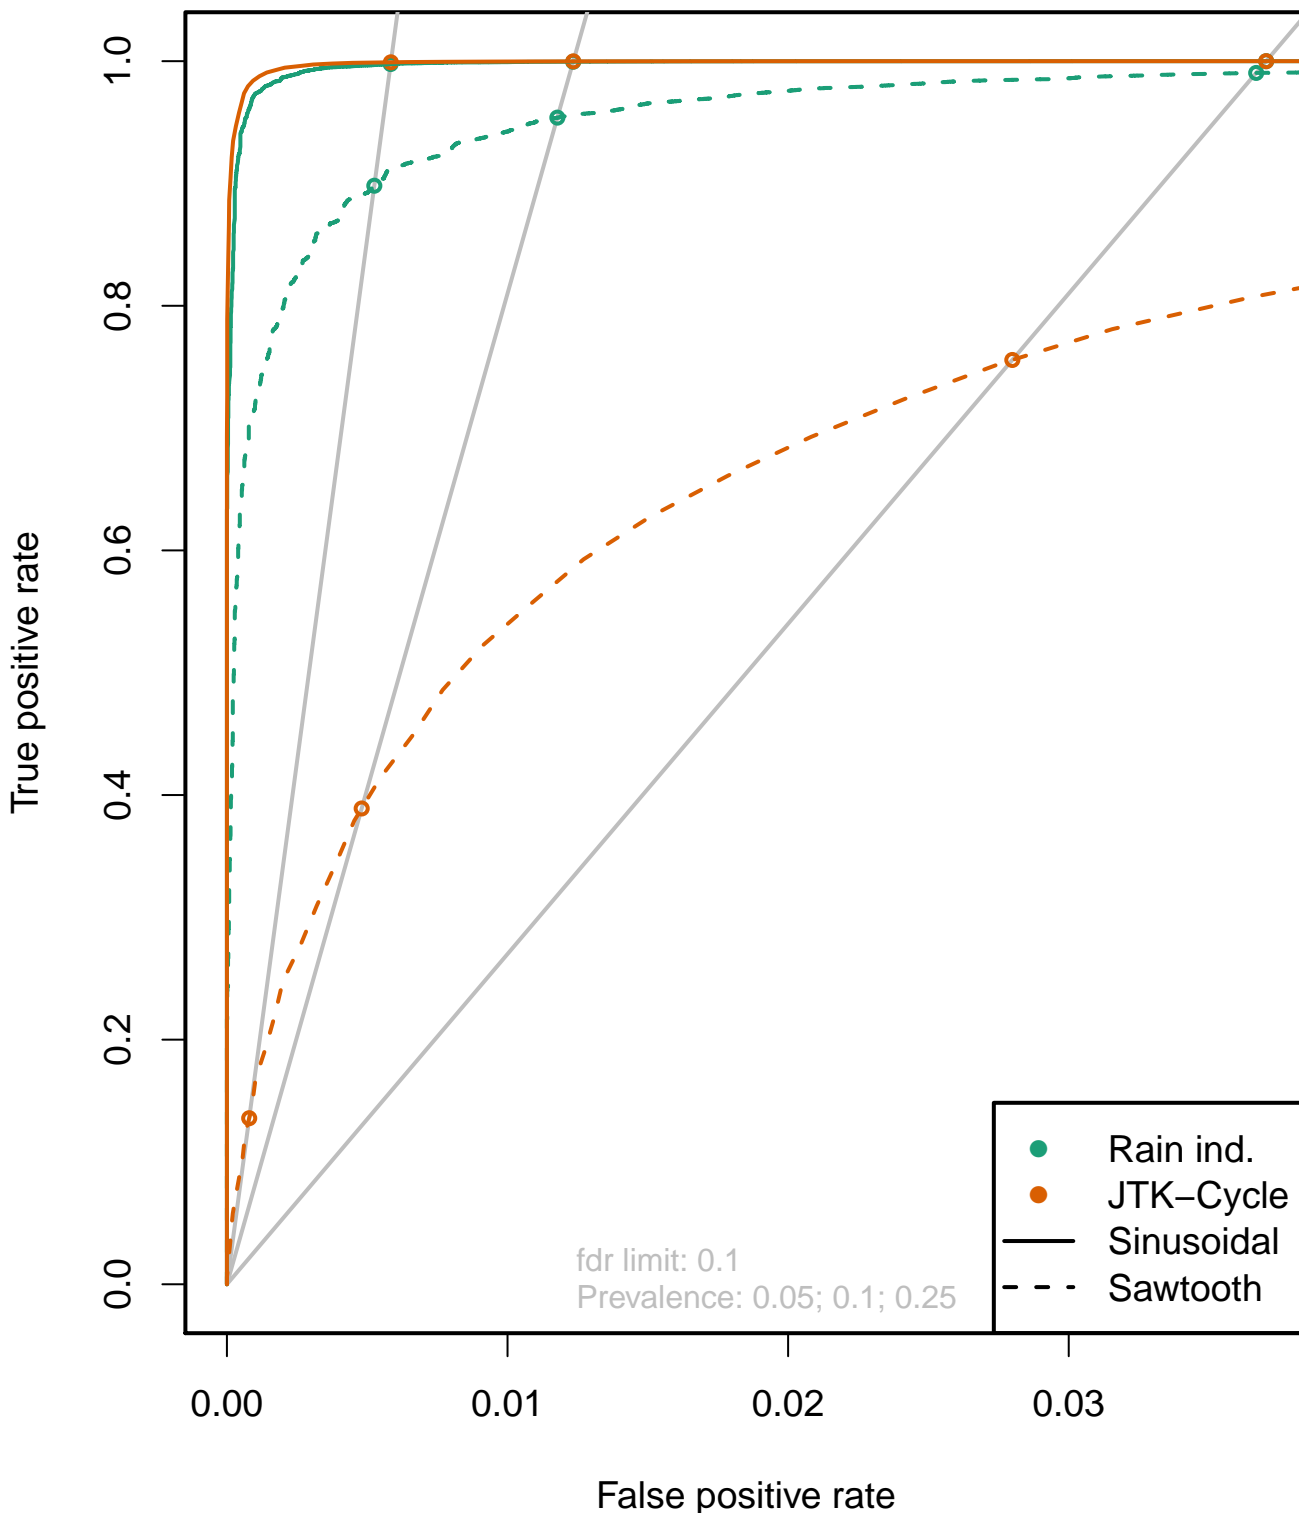

| Rain ind. |      |      |
|-----------|------|------|
|           | sin  | saw  |
| 0.05      | 1.00 | 0.90 |
| 0.1       | 1.00 | 0.95 |
| 0.25      | 1.00 | 0.99 |

| JTK-Cycle |      |      |
|-----------|------|------|
|           | sin  | saw  |
| 0.05      | 1.00 | 0.14 |
| 0.1       | 1.00 | 0.39 |
| 0.25      | 1.00 | 0.76 |

**S-Interval: 2; S to N: native; Outliers: TRUE**

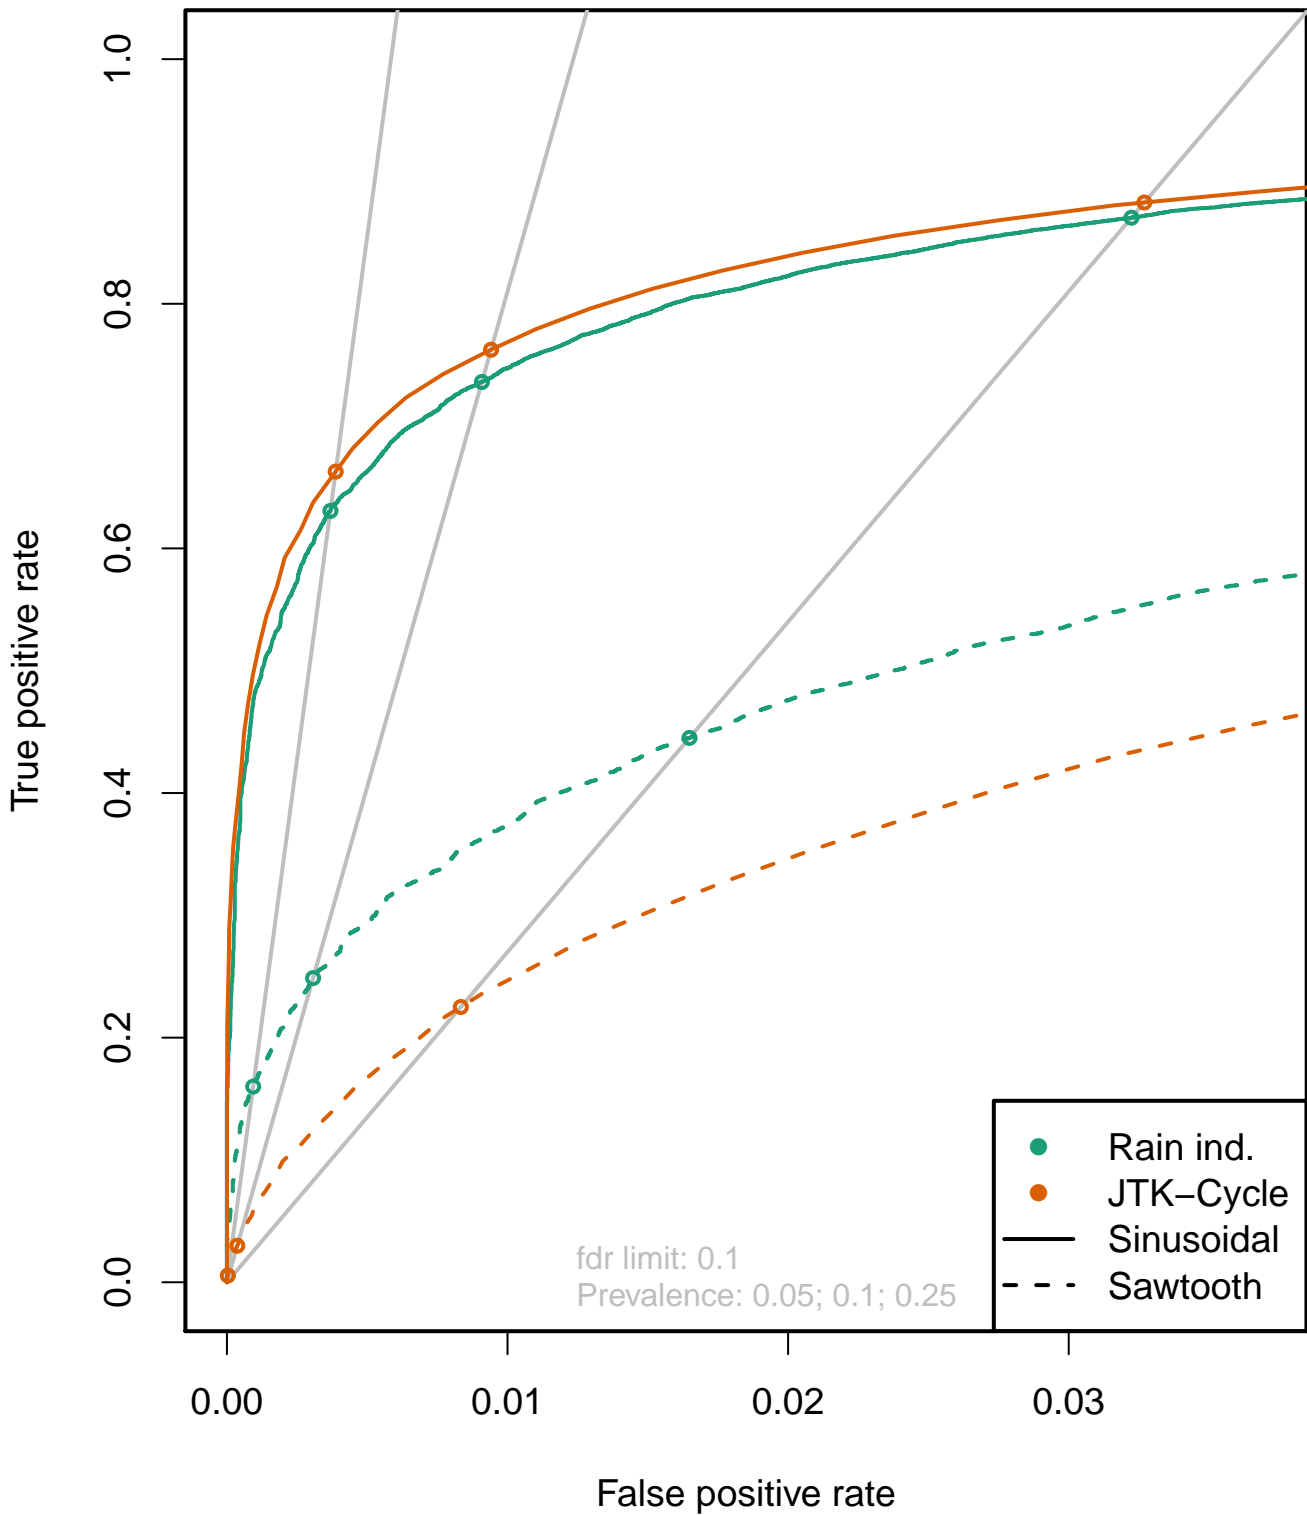

| Rain ind. |      |      |
|-----------|------|------|
|           | sin  | saw  |
| 0.05      | 0.63 | 0.16 |
| 0.1       | 0.74 | 0.25 |
| 0.25      | 0.87 | 0.45 |

| JTK-Cycle |      |      |
|-----------|------|------|
|           | sin  | saw  |
| 0.05      | 0.66 | 0.01 |
| 0.1       | 0.76 | 0.03 |
| 0.25      | 0.88 | 0.23 |



**S-Interval: 3; S to N: 1; Outliers: TRUE**

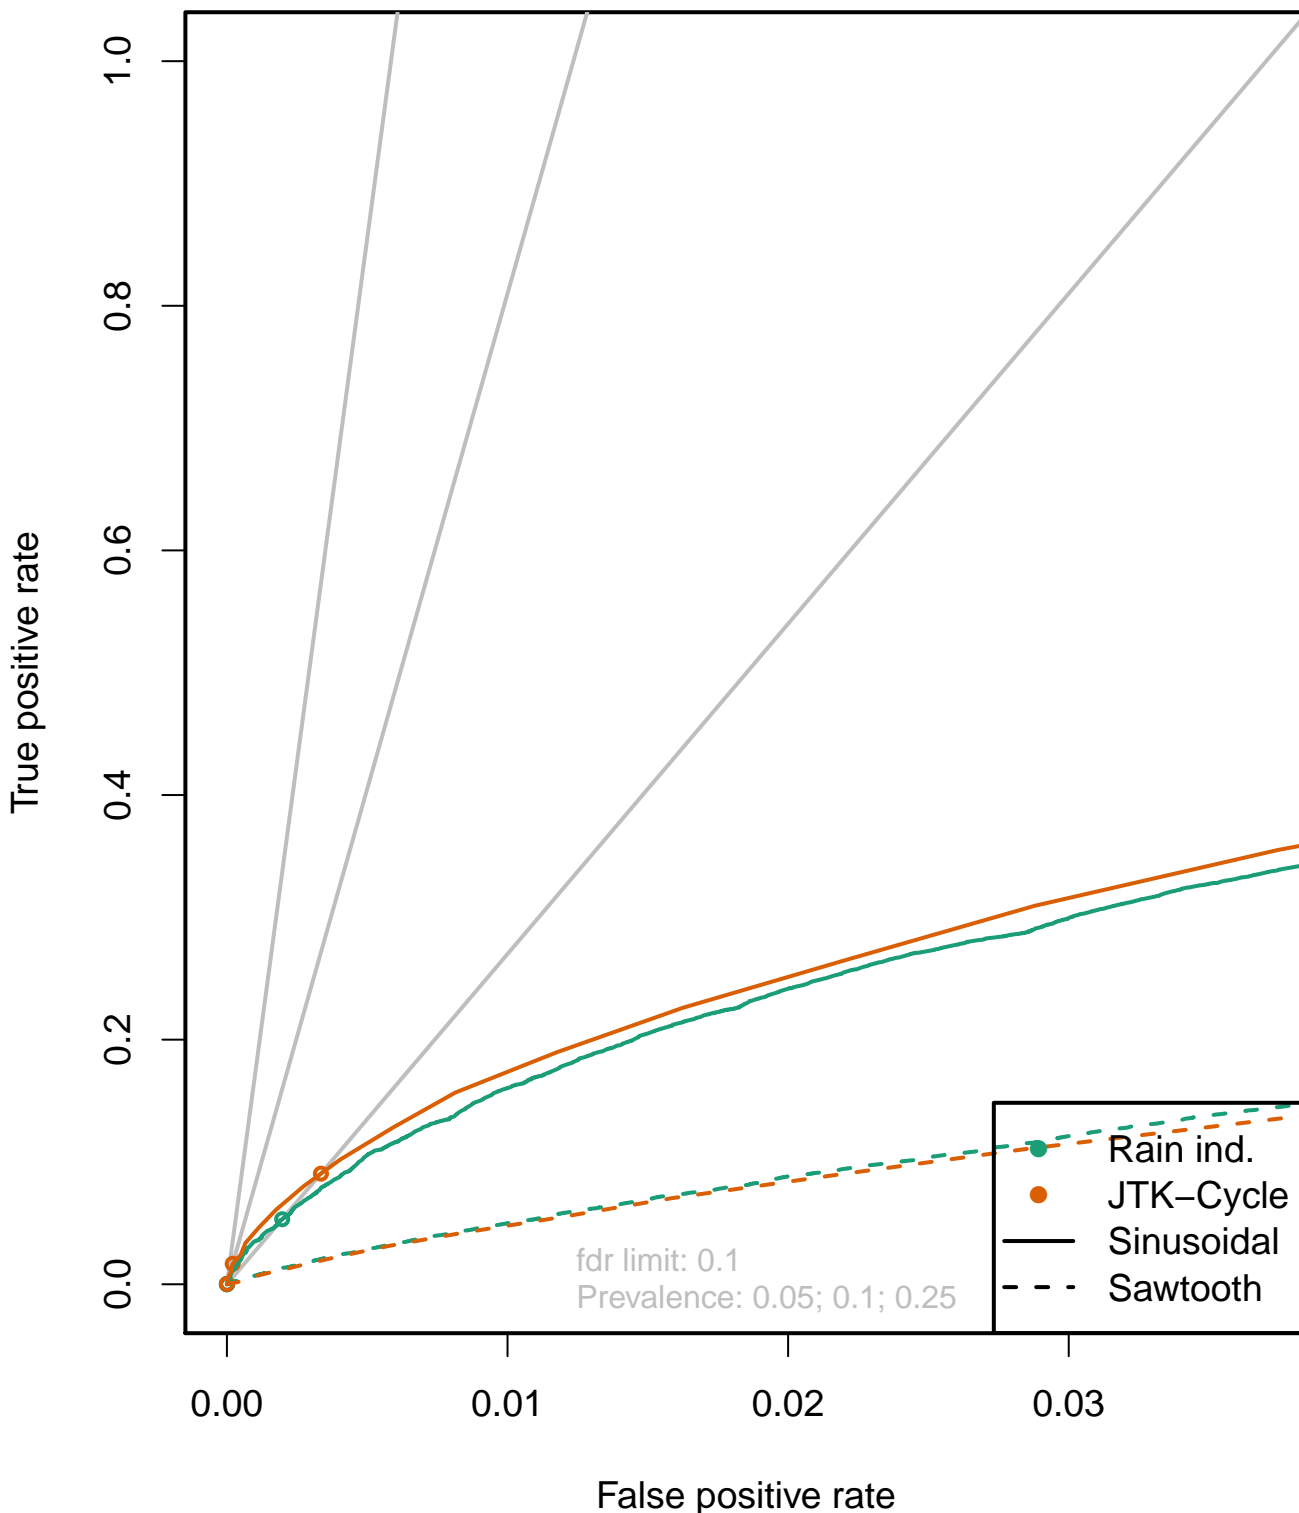

| Rain ind. |      |      |
|-----------|------|------|
|           | sin  | saw  |
| 0.05      | 0.00 | 0.00 |
| 0.1       | 0.00 | 0.00 |
| 0.25      | 0.05 | 0.00 |

| JTK-Cycle |      |     |
|-----------|------|-----|
|           | sin  | saw |
| 0.05      | 0.00 | NA  |
| 0.1       | 0.02 | NA  |
| 0.25      | 0.09 | NA  |

# S-Interval: 3; S to N: 2; Outliers: TRUE

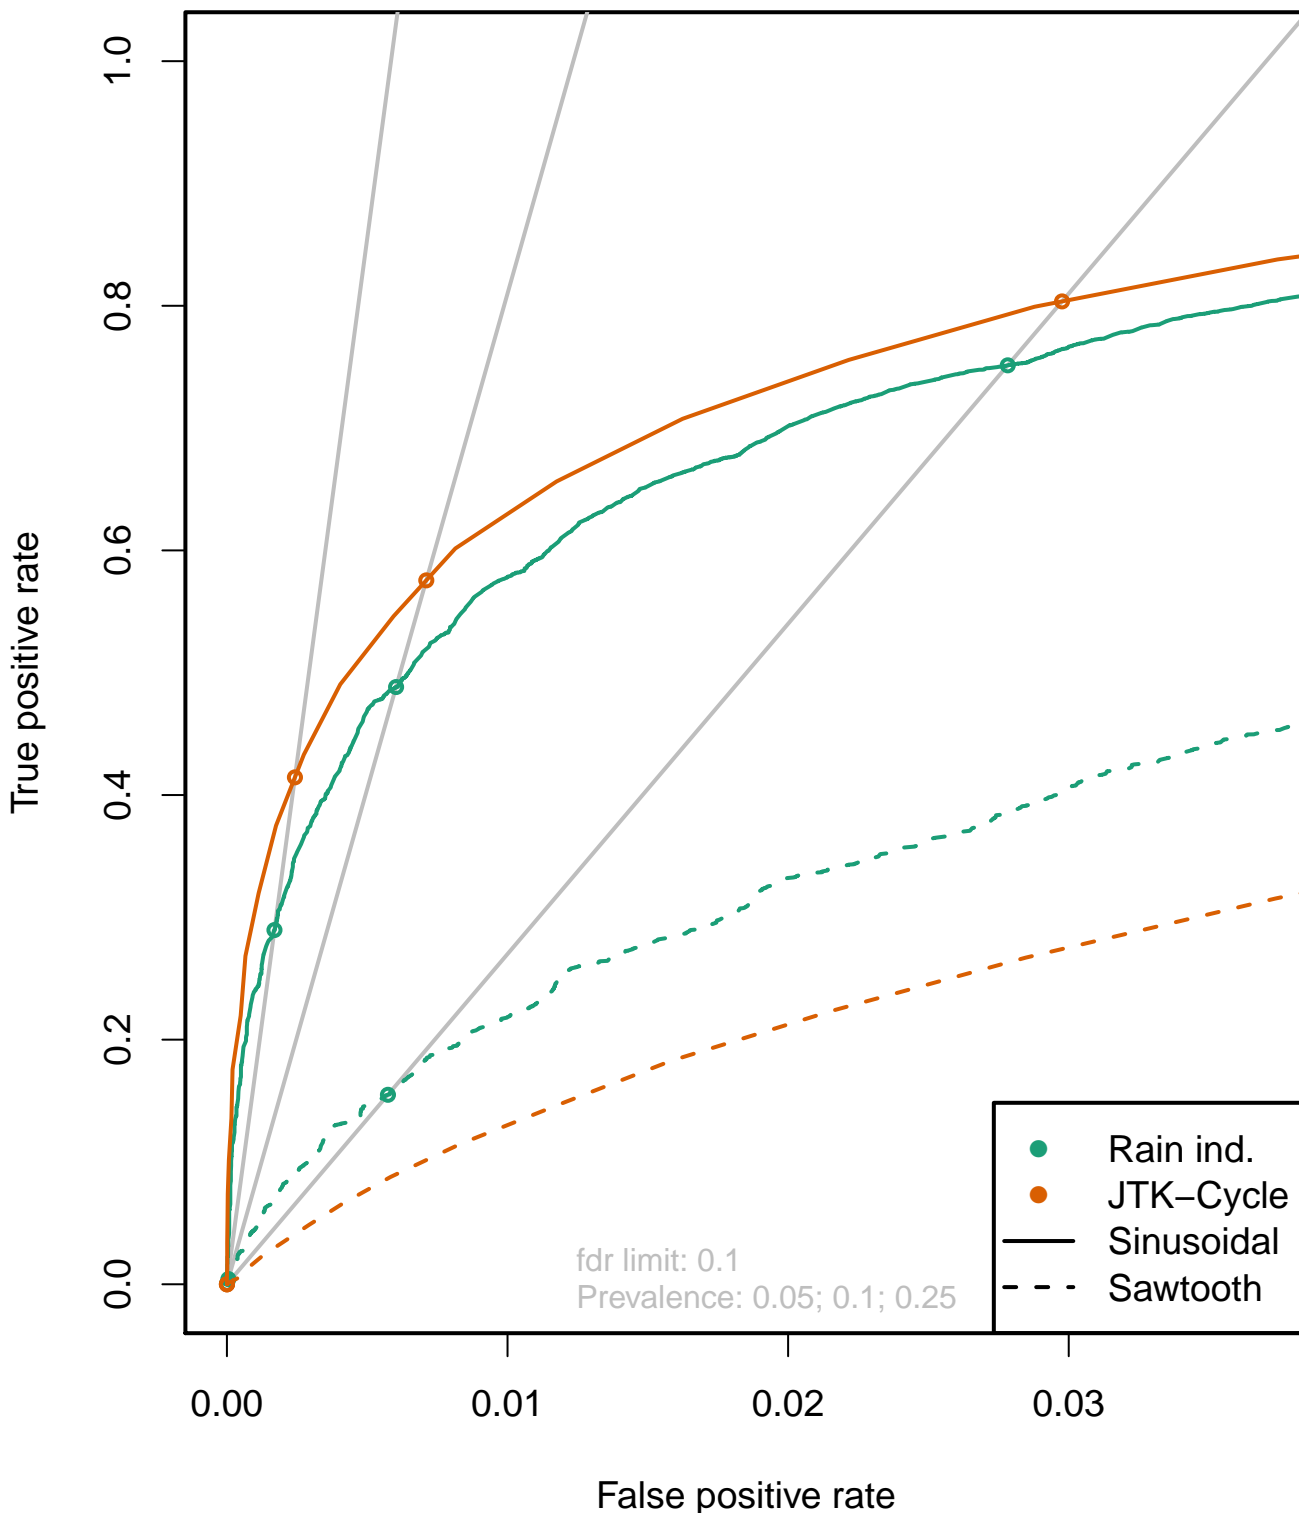

| Rain ind. |      |      |
|-----------|------|------|
|           | sin  | saw  |
| 0.05      | 0.29 | 0.00 |
| 0.1       | 0.49 | 0.00 |
| 0.25      | 0.75 | 0.15 |

| JTK-Cycle |      |      |
|-----------|------|------|
|           | sin  | saw  |
| 0.05      | 0.41 | 0.00 |
| 0.1       | 0.58 | 0.00 |
| 0.25      | 0.80 | 0.00 |

# S-Interval: 3; S to N: 3; Outliers: TRUE

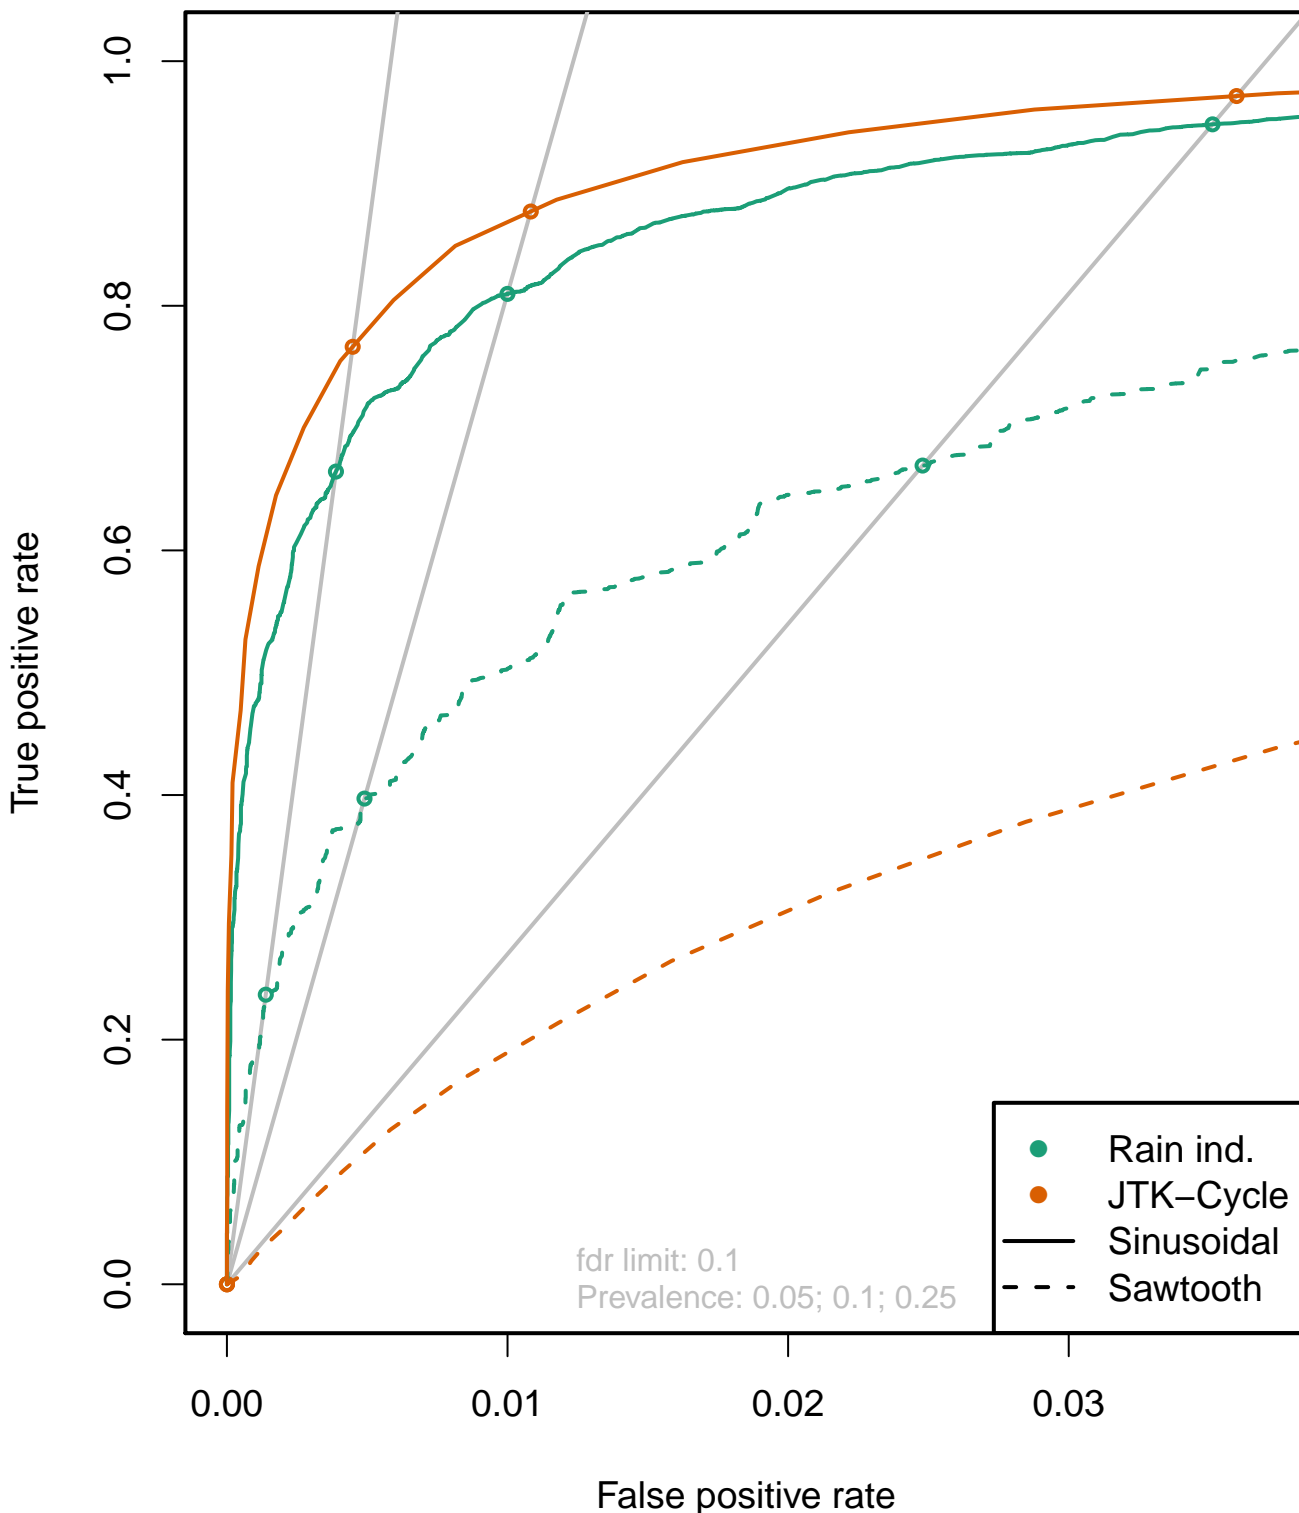

| Rain ind. |      |      |
|-----------|------|------|
|           | sin  | saw  |
| 0.05      | 0.66 | 0.24 |
| 0.1       | 0.81 | 0.40 |
| 0.25      | 0.95 | 0.67 |

| JTK-Cycle |      |      |
|-----------|------|------|
|           | sin  | saw  |
| 0.05      | 0.77 | 0.00 |
| 0.1       | 0.88 | 0.00 |
| 0.25      | 0.97 | 0.00 |

**S-Interval: 3; S to N: native; Outliers: TRUE**

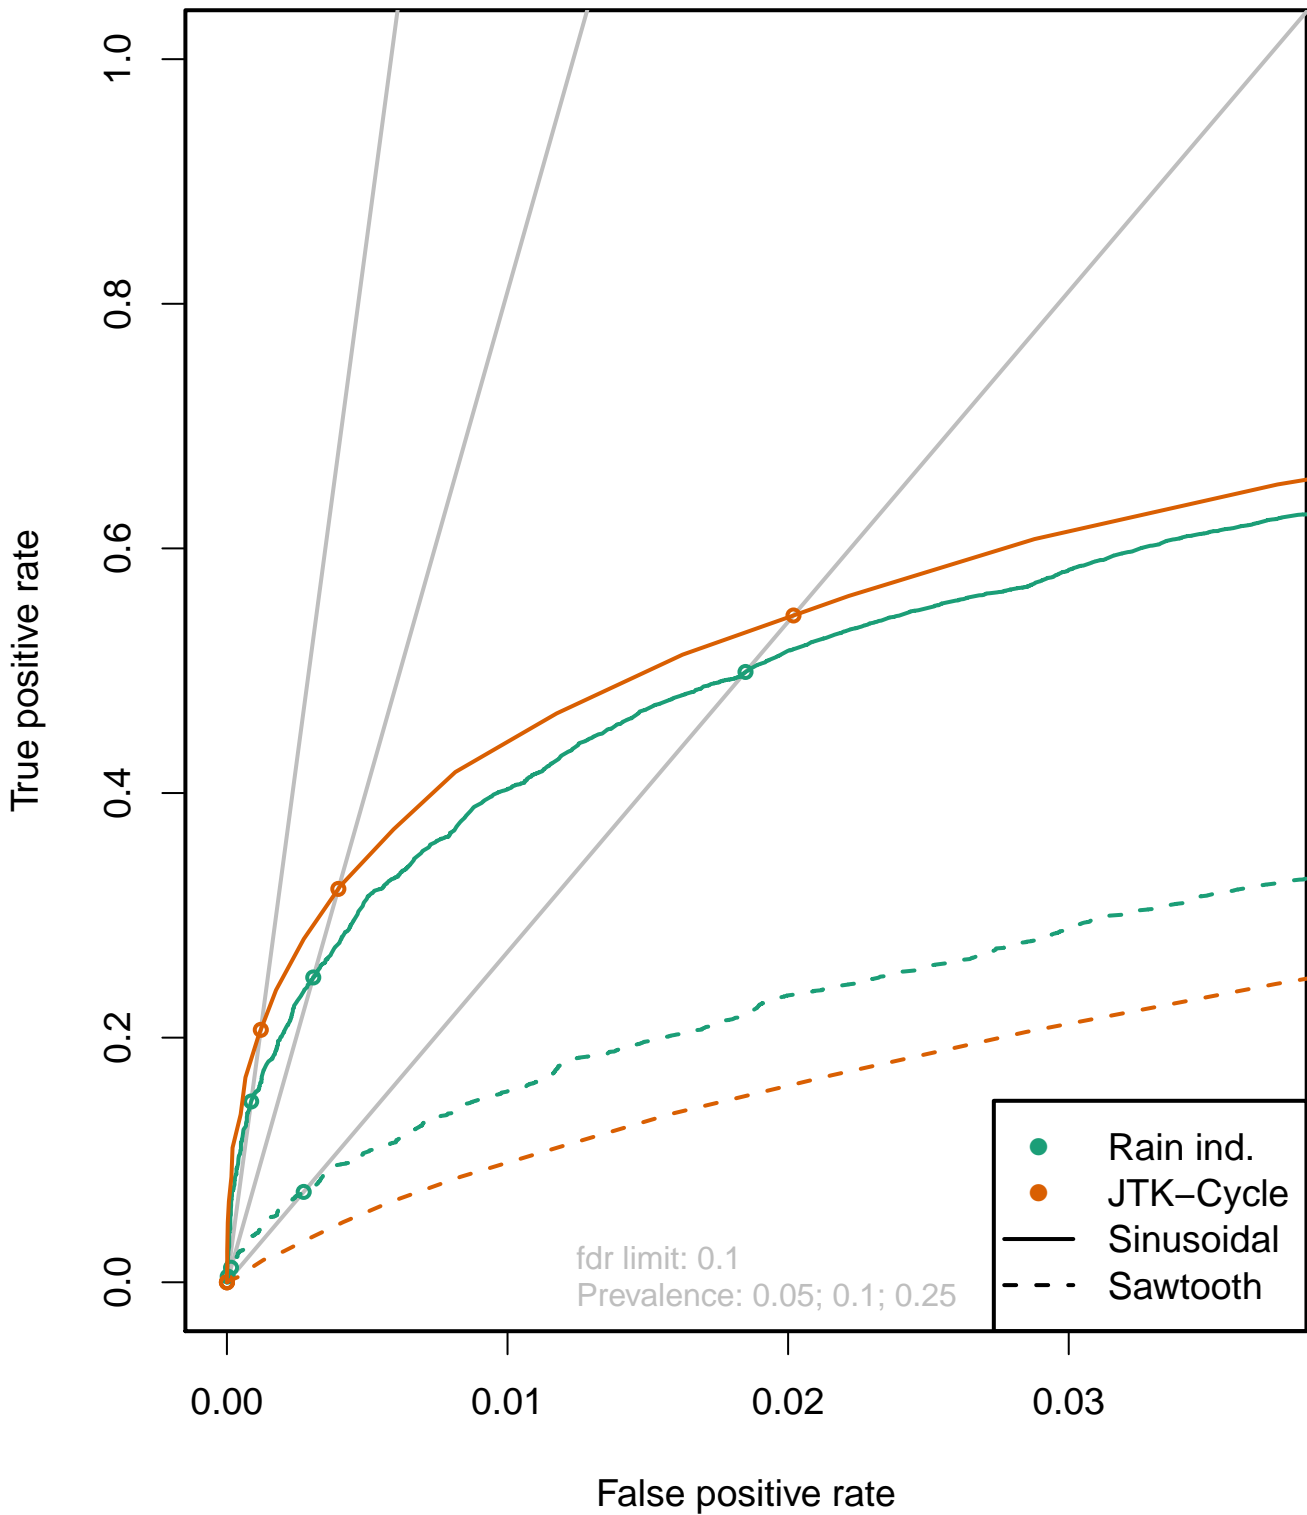

| Rain ind. |      |      |
|-----------|------|------|
| sin       | saw  |      |
| 0.05      | 0.15 | 0.00 |
| 0.1       | 0.25 | 0.01 |
| 0.25      | 0.50 | 0.07 |

| JTK-Cycle |      |      |
|-----------|------|------|
| sin       | saw  |      |
| 0.05      | 0.21 | 0.00 |
| 0.1       | 0.32 | 0.00 |
| 0.25      | 0.55 | 0.00 |

**S-Interval: 4; S to N: 1; Outliers: TRUE**

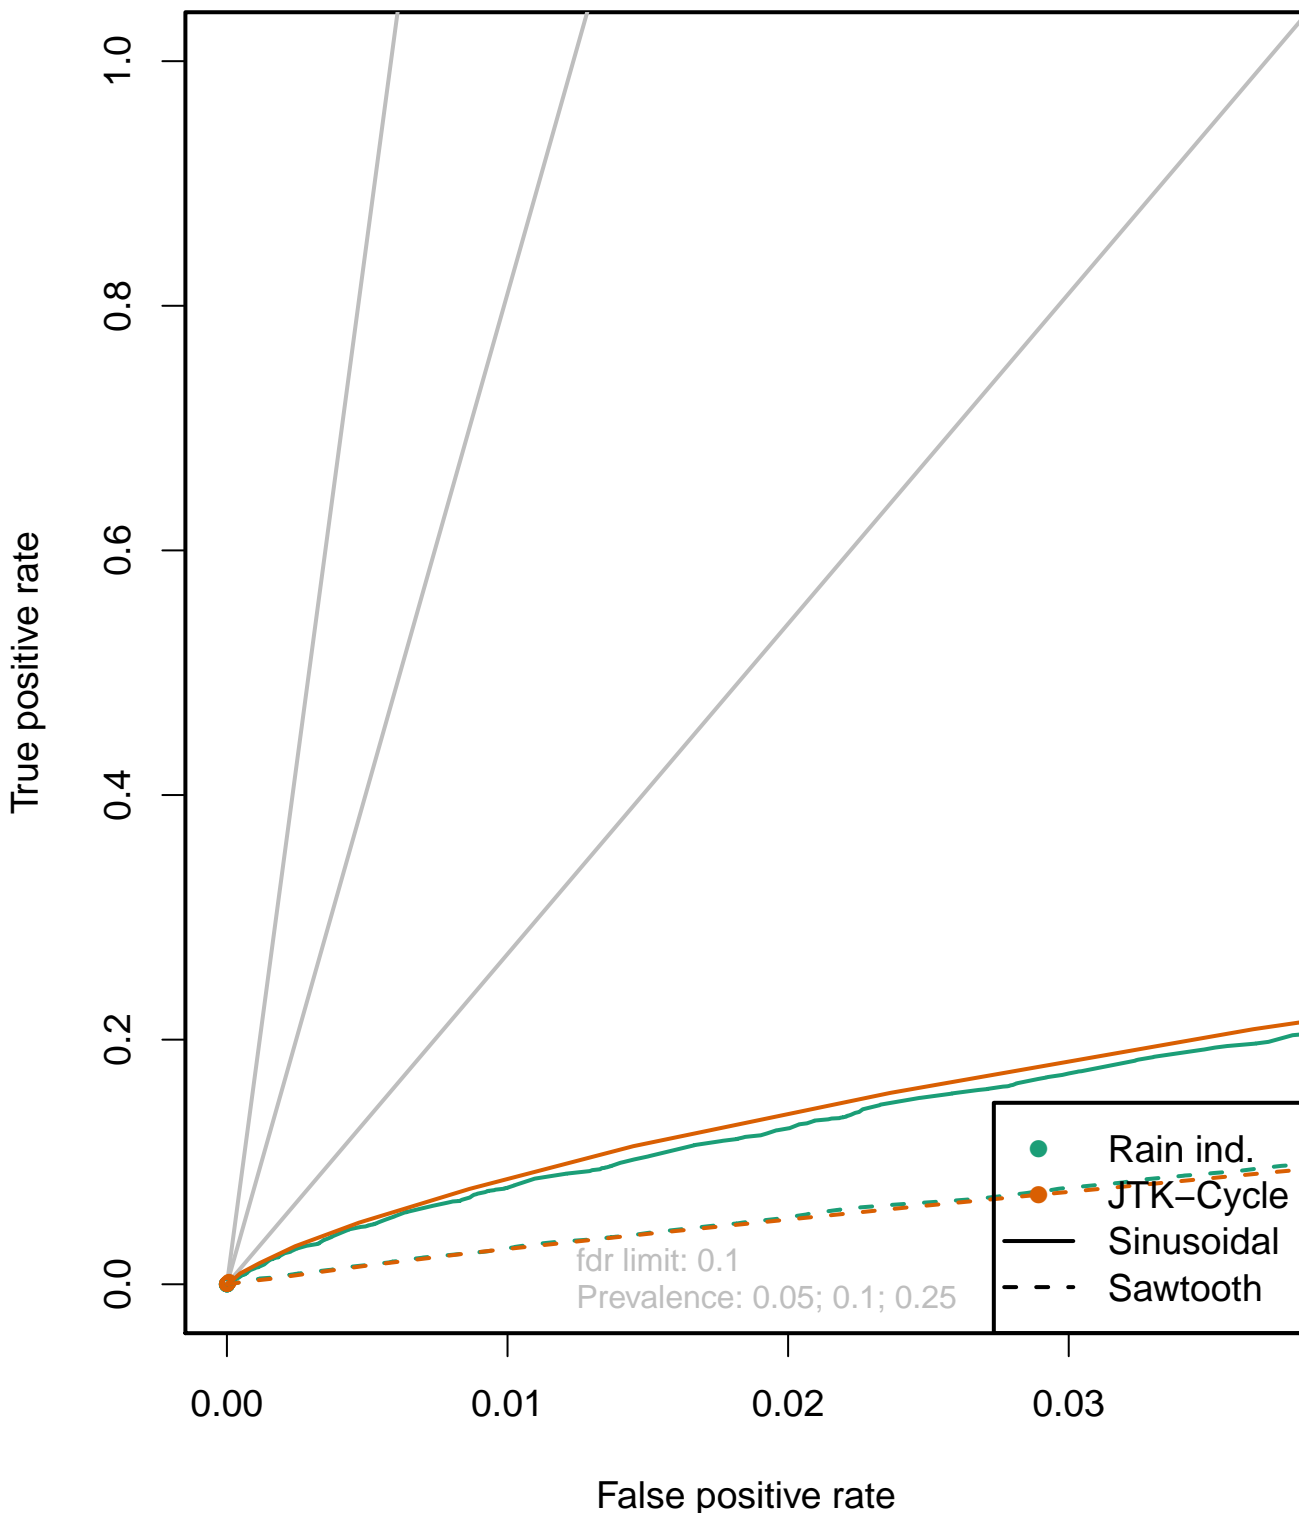

| Rain ind. |      |      |
|-----------|------|------|
|           | sin  | saw  |
| 0.05      | 0.00 | 0.00 |
| 0.1       | 0.00 | 0.00 |
| 0.25      | 0.00 | 0.00 |

| JTK-Cycle |      |     |
|-----------|------|-----|
|           | sin  | saw |
| 0.05      | 0.00 | NA  |
| 0.1       | 0.00 | NA  |
| 0.25      | 0.00 | NA  |

**S-Interval: 4; S to N: 2; Outliers: TRUE**

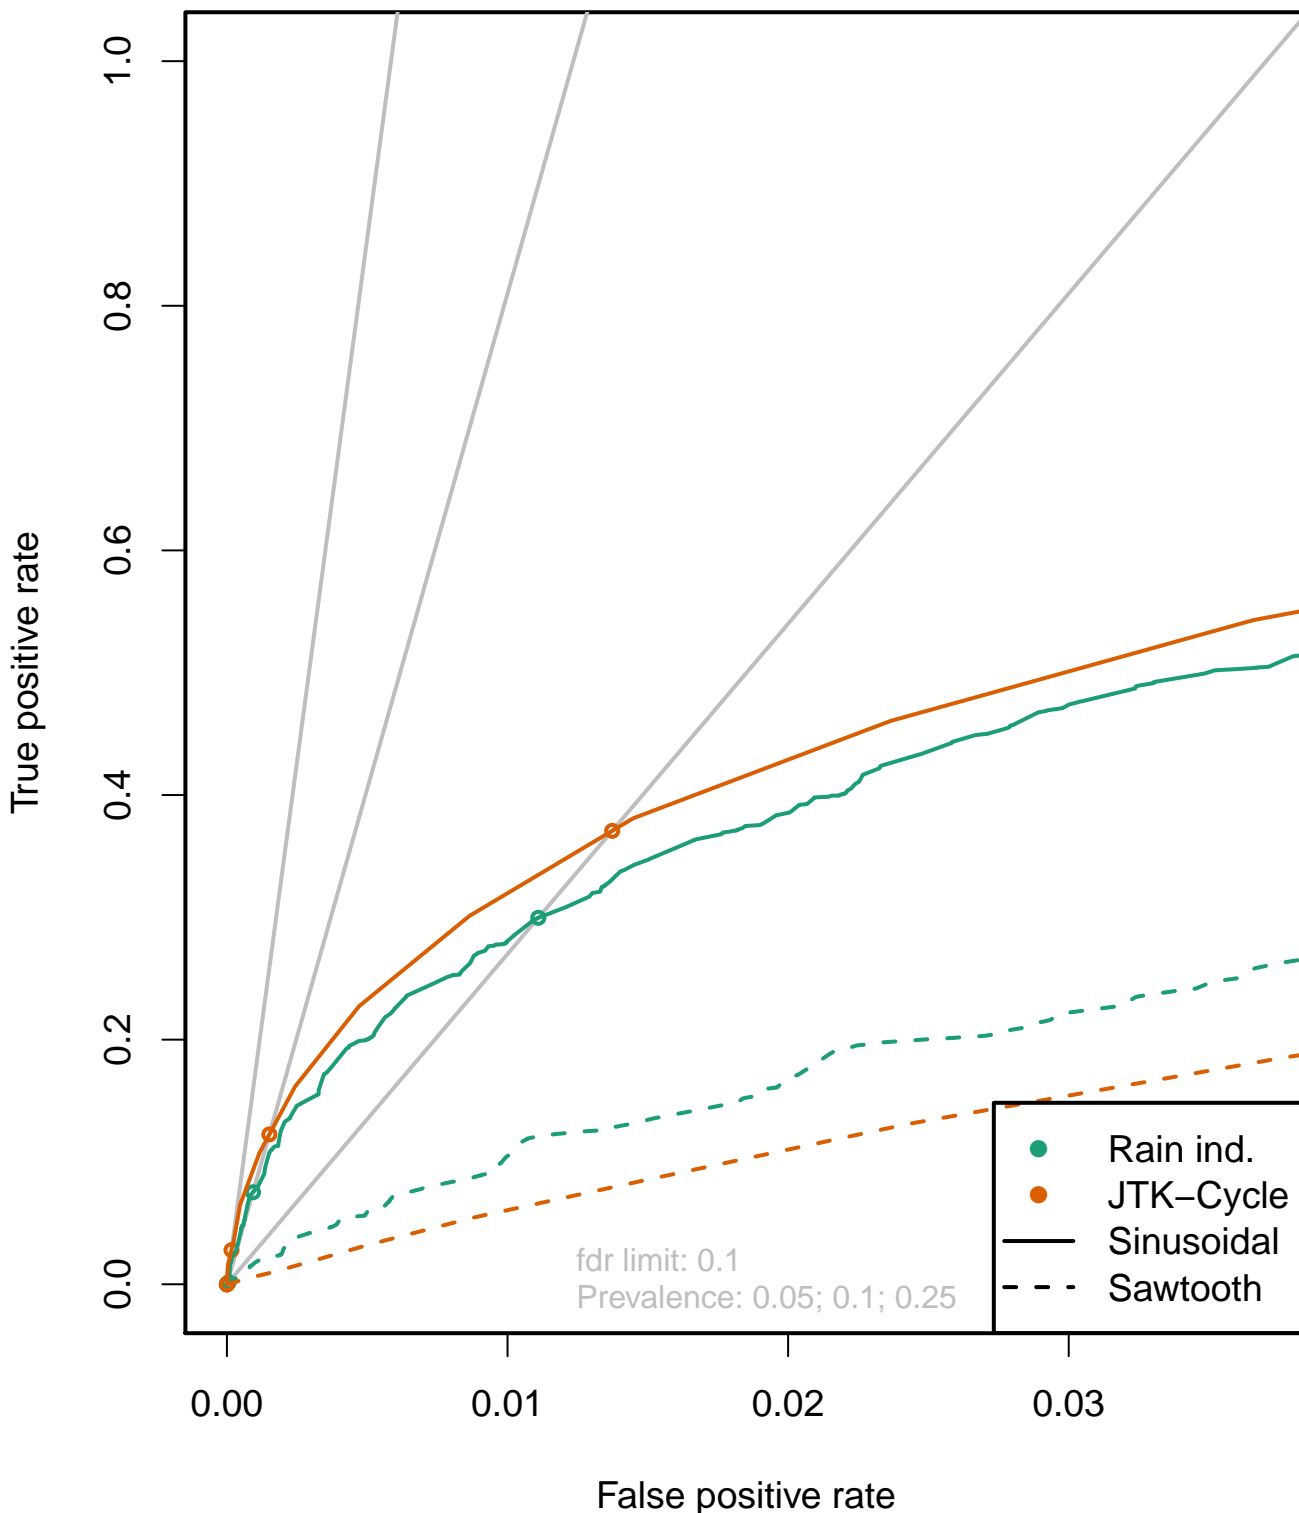

| Rain ind. |      |      |
|-----------|------|------|
|           | sin  | saw  |
| 0.05      | 0.00 | 0.00 |
| 0.1       | 0.08 | 0.00 |
| 0.25      | 0.30 | 0.00 |

| JTK-Cycle |      |      |
|-----------|------|------|
|           | sin  | saw  |
| 0.05      | 0.03 | 0.00 |
| 0.1       | 0.12 | 0.00 |
| 0.25      | 0.37 | 0.00 |

**S-Interval: 4; S to N: 3; Outliers: TRUE**

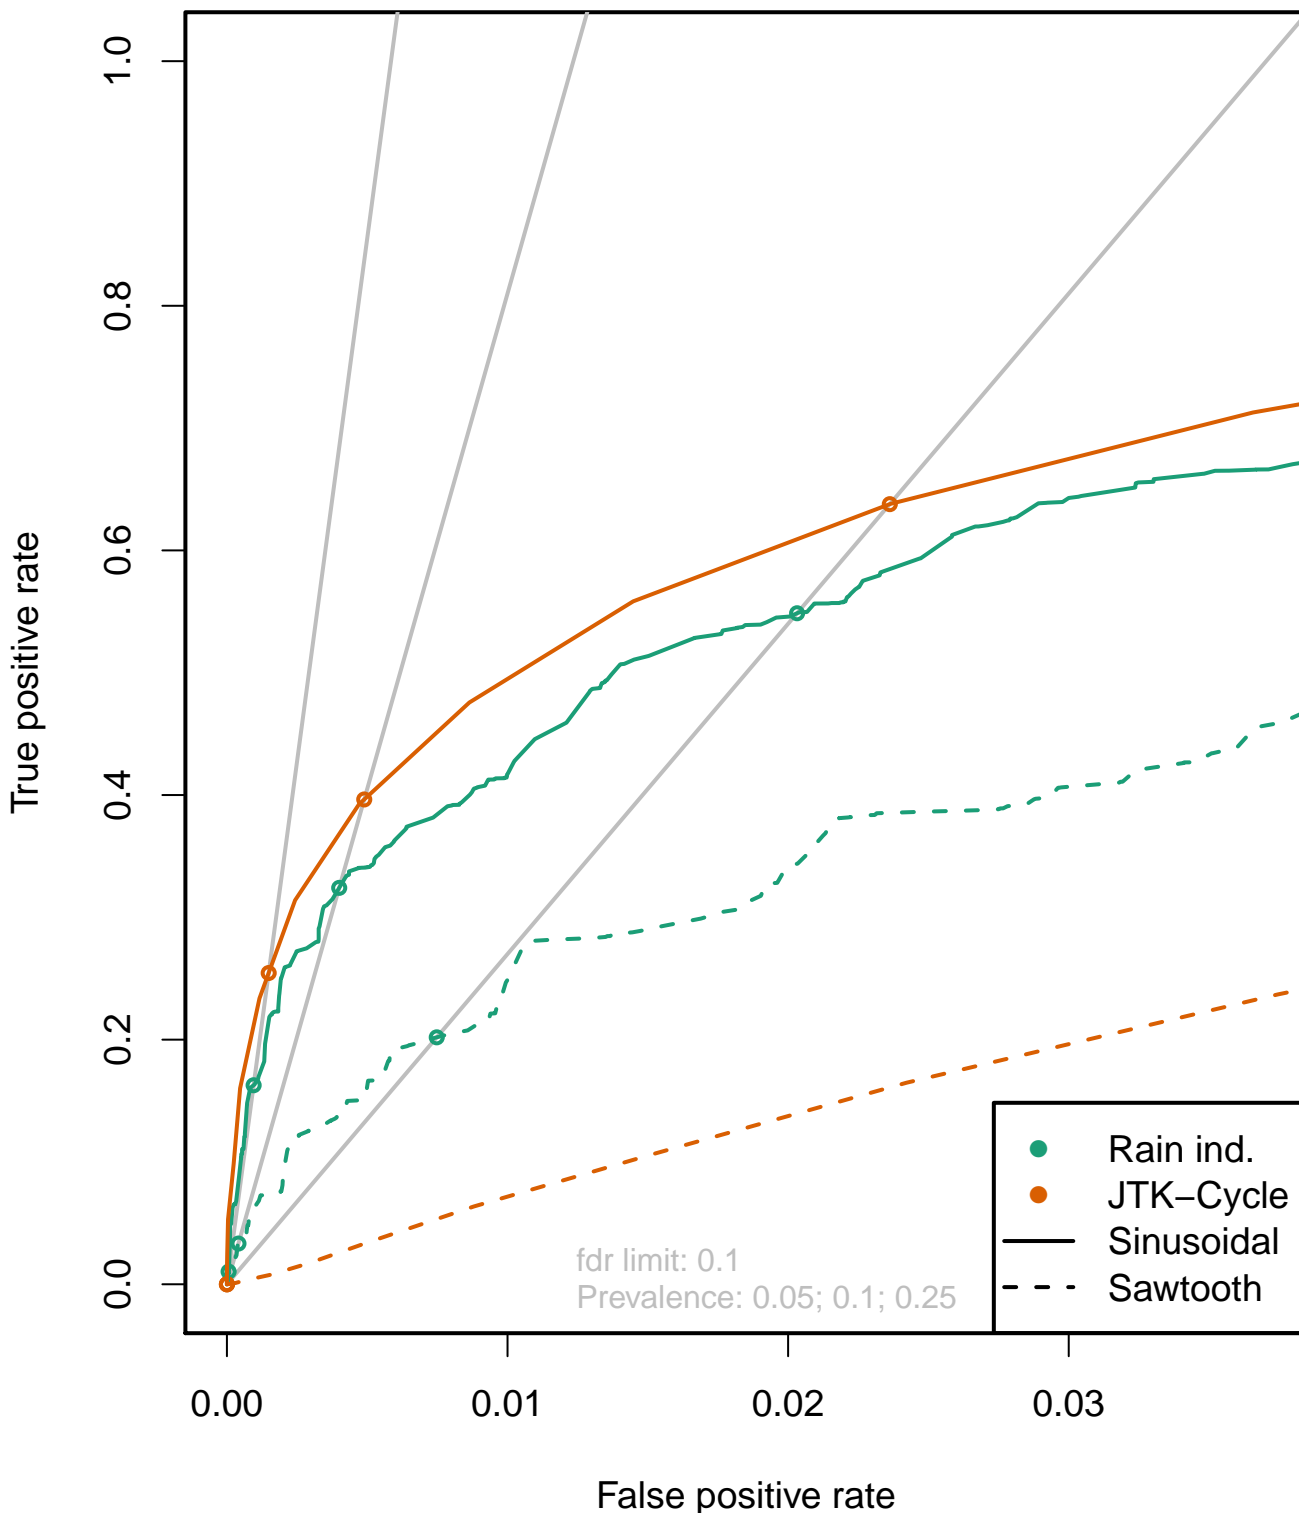

| Rain ind. |      |      |
|-----------|------|------|
| sin       | saw  |      |
| 0.05      | 0.16 | 0.01 |
| 0.1       | 0.32 | 0.03 |
| 0.25      | 0.55 | 0.20 |

| JTK-Cycle |      |      |
|-----------|------|------|
| sin       | saw  |      |
| 0.05      | 0.25 | 0.00 |
| 0.1       | 0.40 | 0.00 |
| 0.25      | 0.64 | 0.00 |

**S-Interval: 4; S to N: native; Outliers: TRUE**

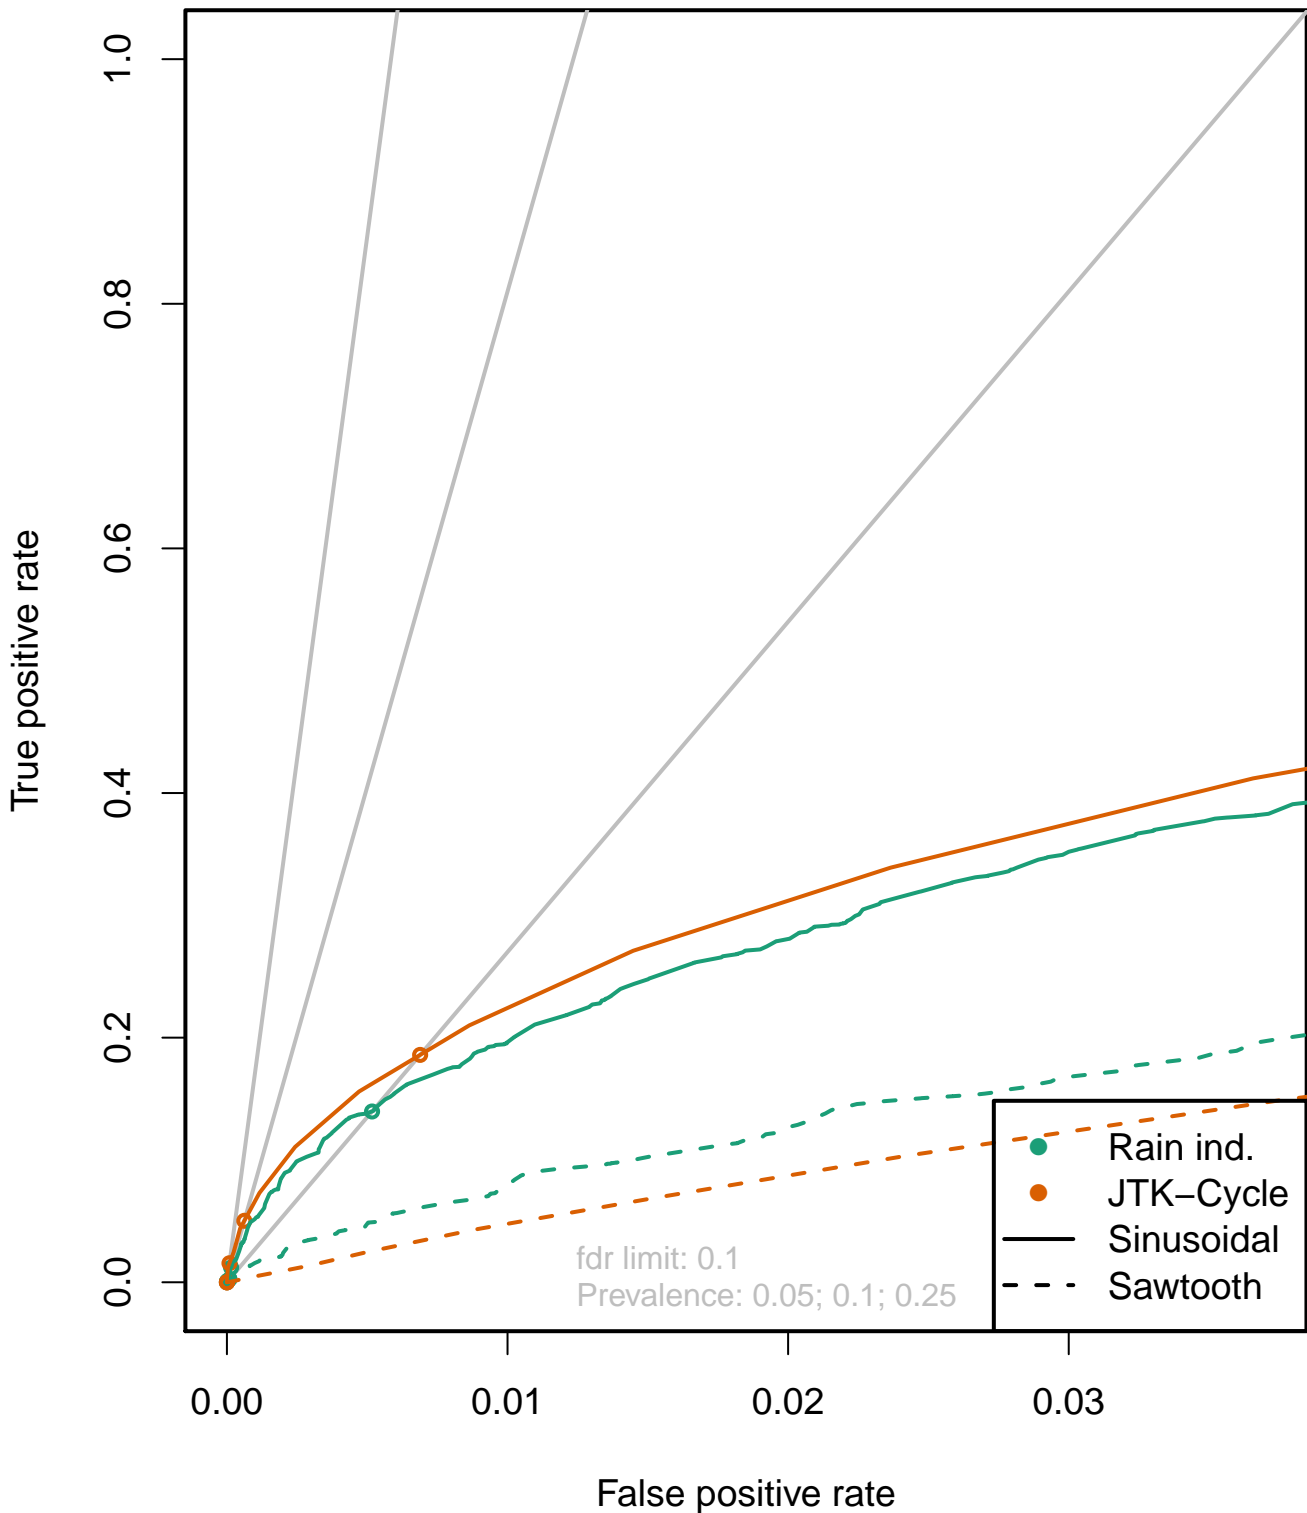

| Rain ind. |      |      |
|-----------|------|------|
|           | sin  | saw  |
| 0.05      | 0.00 | 0.00 |
| 0.1       | 0.01 | 0.00 |
| 0.25      | 0.14 | 0.00 |

| JTK-Cycle |      |      |
|-----------|------|------|
|           | sin  | saw  |
| 0.05      | 0.02 | 0.00 |
| 0.1       | 0.05 | 0.00 |
| 0.25      | 0.19 | 0.00 |
